# Supplementary material for: Ligand field effects on the ground and excited states of reactive FeO 2+ species
Source: Royal Society of Chemistry journal article supplement (doi:10.1039/c8cp05372c), 2018-01-01
Supplement: c8cp05372c1.pdf [file c8cp05372c1.pdf]

Supporting Information for

**Ligand Field Effects on the Ground and Excited States of Reactive FeO<sup>2+</sup> Species**

Justin K. Kirkland<sup>1</sup>, Shahriar N. Khan<sup>2</sup>, Bryan Casale<sup>1</sup>, Evangelos Miliordos<sup>2,\*</sup>, Konstantinos D. Vogiatzis<sup>1,\*</sup>

<sup>1</sup> *Department of Chemistry, University of Tennessee, Knoxville, Tennessee 37996, United States*

<sup>2</sup> *Department of Chemistry and Biochemistry, Auburn University, Auburn, Alabama 36849, United States*

**Table of Contents**

| <b>Section</b>                                                   | <b>Page</b> |
|------------------------------------------------------------------|-------------|
| S1. Examination of Different Active Spaces                       | S-2         |
| S2. Details on the Geometry Coordinates of the Fe(IV)-oxo Models | S-4         |
| S3. Bare [FeO] <sup>2+</sup> Results from MRCI                   | S-10        |
| S4. Analysis the of sigma/pi channels                            | S-16        |
| S5. Active Space Molecular Orbitals from CASSCF Calculations     | S-25        |
| S6. Geometry Coordinates from Symmetric Ligand Scan Geometries   | S-32        |

## S1. Examination of Different Active Spaces

| Structure                                                                              | Active Space                                                                           | Absolute CASSCF Energies (a.u.) | Dominant Configuration(s)                                            | CI Coefficient                     |
|----------------------------------------------------------------------------------------|----------------------------------------------------------------------------------------|---------------------------------|----------------------------------------------------------------------|------------------------------------|
| [Fe(O)(H <sub>2</sub> O) <sub>5</sub> ] <sup>2+</sup>                                  | CAS(10,8)                                                                              | -1726.41262059                  | 222uuuu0<br>2u2duuuu                                                 | 0.70275<br>0.10806                 |
|                                                                                        | CAS(10,13)                                                                             | -1726.49941643                  | 222uuuu0 00000<br>2u2duuuu 00000                                     | 0.73739<br>0.07872                 |
|                                                                                        | CAS(18,12)                                                                             | -1726.43981644                  | 222222uuuu0<br>22222u2duuuu                                          | 0.70205<br>0.10400                 |
|                                                                                        | RAS(18,12)                                                                             | -1726.43977403                  | 222222uuuu0<br>22222u2duuuu                                          | 0.70191<br>0.10390                 |
| [Fe(O)(H <sub>2</sub> O) <sub>4</sub> ] <sup>2+</sup>                                  | CAS(10,8)                                                                              | -1650.24633190                  | 222uuuu0<br>u22duuuu                                                 | 0.72081<br>0.09620                 |
|                                                                                        | RAS(22,14)                                                                             | -1650.27544067                  | 22222222uuuu0<br>222222u22duuuu                                      | 0.71252<br>0.09545                 |
| [Fe(O)(H <sub>2</sub> O) <sub>ax</sub> (NH <sub>3</sub> ) <sub>4</sub> ] <sup>2+</sup> | CAS(10,8)                                                                              | -1646.97217912                  | 2u22uu0u<br>ud22uuuu<br>0u22uu2u                                     | 0.80836<br>0.03308<br>0.04262      |
|                                                                                        | RAS(24,15)                                                                             | -1647.00507061                  | 2222222 2u22uu0u<br>2222222 ud22uuuu<br>2222222 0u22uu2u             | 0.80551<br>0.03027<br>0.03783      |
|                                                                                        | RAS(26,16)                                                                             | -1647.00533346                  | 22222222 2u22uu0u<br>22222222 ud22uuuu<br>22222222 0u22uu2u          | 0.80566<br>0.03020<br>0.03777      |
|                                                                                        | RAS(28,17)                                                                             | -1647.00543248                  | 222222222 2u22uu0u<br>222222222 ud22uuuu<br>222222222 0u22uu2u       | 0.80564<br>0.03017<br>0.03771      |
|                                                                                        | RAS(30,18)                                                                             | -1647.00553460                  | 2222222222 2u22uu0u<br>2222222222 ud22uuuu<br>2222222222 0u22uu2u    | 0.80561<br>0.03017<br>0.03767      |
|                                                                                        | RAS(32,19)                                                                             | -1647.00556318                  | 22222222222 2u22uu0u<br>22222222222 ud22uuuu<br>22222222222 0u22uu2u | 0.80555<br>0.03018<br>0.03768      |
|                                                                                        | [Fe(O)(H <sub>2</sub> O) <sub>ax</sub> (NH <sub>3</sub> ) <sub>3</sub> ] <sup>2+</sup> | RAS(22,14)                      | -1590.72835843                                                       | 222222 222uuuu0<br>222222 2u2duuuu |
| [Fe(O)(NH <sub>3</sub> ) <sub>4</sub> ] <sup>2+</sup>                                  | RAS(24,15)                                                                             | -1570.87276760                  | 2222222 222uuuu0<br>2222222 22uduuuu                                 | 0.72358<br>0.06911                 |
|                                                                                        | RAS(28,17)                                                                             | -1570.87375007                  | 222222222 222uuuu0<br>222222222 22uduuuu                             | 0.72358<br>0.06911                 |

**Table S1:** Comparison of CASSCF/RASSCF energies, dominant electronic configurations and CI vectors.

| Structure                                                                   | Active Space | $E_{\text{gap}} (\sigma-\pi)$ at $R_{\text{Fe-O}}=1.6\text{\AA}$<br>(eV) |
|-----------------------------------------------------------------------------|--------------|--------------------------------------------------------------------------|
| $[\text{Fe}(\text{O})(\text{H}_2\text{O})_5]^{2+}$                          | CAS(10,8)    | 1.23                                                                     |
|                                                                             | CAS(10,13)   | 1.13                                                                     |
|                                                                             | CAS(18,12)   | 1.24                                                                     |
|                                                                             | RAS(18,12)   | 1.24                                                                     |
| $[\text{Fe}(\text{O})(\text{H}_2\text{O})_4]^{2+}$                          | CAS(10,8)    | 1.29                                                                     |
|                                                                             | CAS(20,13)   | 1.30                                                                     |
|                                                                             | RAS(22,14)   | 1.28                                                                     |
| $[\text{Fe}(\text{O})(\text{H}_2\text{O})_{\text{ax}}(\text{NH}_3)_4]^{2+}$ | CAS(18,12)   | 1.65                                                                     |
|                                                                             | RAS(22,14)   | 1.62                                                                     |
|                                                                             | RAS(24,15)   | 1.67                                                                     |
| $[\text{Fe}(\text{O})(\text{H}_2\text{O})_{\text{ax}}(\text{NH}_3)_3]^{2+}$ | CAS(20,13)   | 1.56                                                                     |
|                                                                             | RAS(22,14)   | 1.53                                                                     |
|                                                                             | RAS(24,15)   | 1.51                                                                     |
| $[\text{Fe}(\text{O})(\text{NH}_3)_4]^{2+}$                                 | CAS(20,13)   | 1.79                                                                     |
|                                                                             | RAS(22,14)   | 1.77                                                                     |
|                                                                             | RAS(24,15)   | 1.77                                                                     |

**Table S2:** MS(3)-CASPT2 or MS(3)-RASPT2 energy differences between the ground quintet state and the first doubly degenerate quintet excited state at  $R_{\text{Fe-O}} = 1.60 \text{ \AA}$  by considering different active space size. Results from a CAS(10,8) for the three models with strong ligand fields are not included, i.e.  $[\text{Fe}(\text{O})(\text{H}_2\text{O})_{\text{ax}}(\text{NH}_3)_4]^{2+}$ ,  $[\text{Fe}(\text{O})(\text{H}_2\text{O})_{\text{ax}}(\text{NH}_3)_3]^{2+}$  and  $[\text{Fe}(\text{O})(\text{NH}_3)_4]^{2+}$ , since the lack of ligand orbitals introduced instabilities in the potential energy curves.

## S2. Details on the Geometry Coordinates of the Fe(IV)-oxo Models

In two recent publications, Kazaryan and Baerends<sup>1</sup>, and Andrikopoulos et al.<sup>2</sup> used the same model complexes ( $[\text{Fe}(\text{O})(\text{H}_2\text{O})_5]^{2+}$ ,  $[\text{Fe}(\text{O})(\text{NH}_3)_4(\text{H}_2\text{O})]^{2+}$ ) as in our work. A short comparison between their results obtained with the BLYP and OLYP density functionals, respectively, as well as with other popular functionals and multiconfigurational methods is presented in Table S3. All calculations were performed on the structures reported in Ref. 2.

For the  $[\text{Fe}(\text{O})(\text{H}_2\text{O})_5]^{2+}$  case, results from CASPT2 are in agreement with those from hybrid functionals (B3LYP and OLYP). On the contrary, for the strong field case ( $[\text{Fe}(\text{O})(\text{NH}_3)_4(\text{H}_2\text{O})]^{2+}$ ), all single-point calculations with multiconfigurational methods predict the wrong ground spin state (quintet rather than the triplet). Addition of orbitals from the ligand field (lone pair of nitrogen atoms) reduced the energy gap between the two spin states from -19.7 (CASPT2(10,8)) to -5.5 kcal/mol (CASPT2(18,12), but the triplet is still the ground state. The addition of the second shell (4d) orbitals and 3p orbitals of Fe didn't affect significantly the energy difference. As it has been discussed by others,<sup>3-4</sup> disagreement between multireference and DFT results might occur in strong fields, which can be solved by optimization at the CASSCF or CASPT2 level. For that reason, we have calculated separately potential energy curves along the symmetrical dissociation of the Fe-NH<sub>3</sub> bonds. For sake of consistency, the same procedure was repeated for the  $[\text{Fe}(\text{O})(\text{H}_2\text{O})_5]^{2+}$  model complex (symmetric dissociation of the Fe-H<sub>2</sub>O bond distances). A CAS(10,8) active space that includes the five 3d orbitals of Fe and the three 2p orbitals of O is adequate for the two models with only H<sub>2</sub>O ligands. Thus, the symmetric scans for the  $[\text{Fe}(\text{O})(\text{H}_2\text{O})_4]^{2+}$  and  $[\text{Fe}(\text{O})(\text{H}_2\text{O})_5]^{2+}$  models were performed at the MS-CASPT2(10,8) level. On the contrary, for obtaining the correct spin energy difference of the three models that include the strong donor NH<sub>3</sub> ligands, the addition of the 3s3p of Fe, the 2s of oxygen and ligand orbitals was mandatory. Those additions increase the size of the active space to (24,15) for the models. Since multi-state CASPT2 scans with many roots per spin state performed with these active spaces are computationally expensive, the MS-RASPT2 scheme was preferred. The additional lone pair orbitals of NH<sub>3</sub>, the 3s3p of Fe and the 2s of the oxygen were included into the RAS1 space, while RAS2 included the important orbitals of the FeO<sup>2+</sup> moiety. One- and two-electron excitations to RAS2 were allowed.

| Level of Theory           | Quintet – Triplet $\Delta E$ (kcal/mol)            |                                                                 |
|---------------------------|----------------------------------------------------|-----------------------------------------------------------------|
|                           | $[\text{Fe}(\text{O})(\text{H}_2\text{O})_5]^{2+}$ | $[\text{Fe}(\text{O})(\text{NH}_3)_4(\text{H}_2\text{O})]^{2+}$ |
| TPSS                      | -6.7                                               | 16.9                                                            |
| BLYP                      | -5.8                                               | 17.4                                                            |
| BLYP <sup>a</sup>         | -5.2                                               | 12.3                                                            |
| B3LYP                     | -16.4                                              | 6.8                                                             |
| OLYP <sup>b</sup>         | -16.1                                              | 3.8                                                             |
| CASSCF(10,8)              | -22.4                                              | -24.1                                                           |
| CASPT2(10,8)              | -22.8                                              | -19.7                                                           |
| CASPT2(18,12)             | -                                                  | -5.5                                                            |
| SA-RASSCF(24,15)          | -                                                  | -15.2                                                           |
| MS-RASPT2(24,15)          | -                                                  | -8.3                                                            |
| RASSCF(30,18)             | -                                                  | -16.0                                                           |
| RASPT2(30,18)             | -                                                  | -5.9                                                            |
| <sup>a</sup> From Ref. 1. |                                                    |                                                                 |
| <sup>b</sup> From Ref. 2. |                                                    |                                                                 |

**Table S3:** Comparison between different levels of theory (DFT and multiconfigurational methods) for the two complexes under study.

### 1. $[\text{Fe}(\text{O})(\text{H}_2\text{O})_4]^{2+}$ : CASPT2(10,8)

CAS: 3*d* of Fe, 2*p* of O

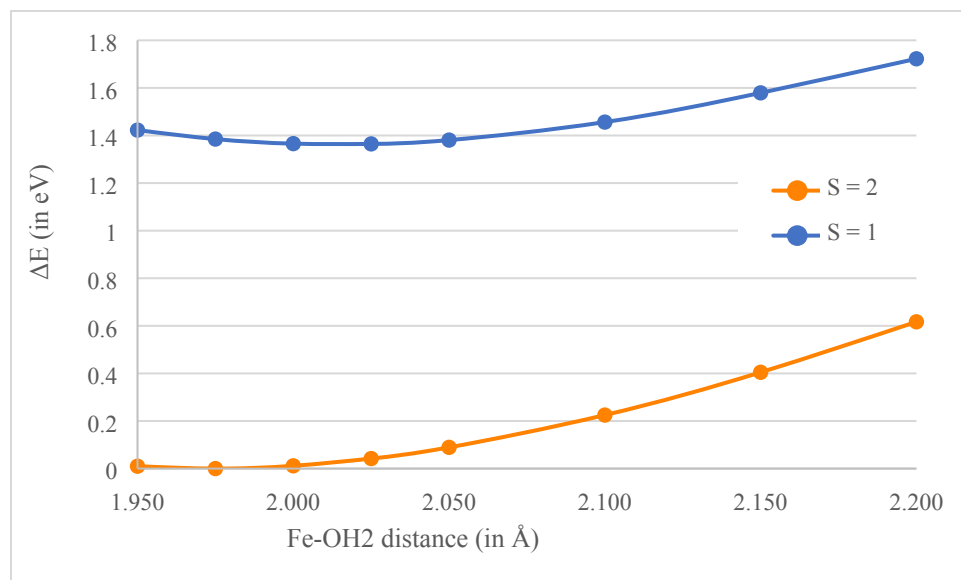

**Figure S1:** Potential energy curves for the symmetric dissociation of the three Fe-O bonds of  $[\text{Fe}(\text{O})(\text{H}_2\text{O})_4]^{2+}$  (pseudo- $C_{3v}$  symmetry).

For all Fe-OH<sub>2</sub> bond distances along equatorial plane the quintet state is the ground state with a minimum of 1.975 Å. This makes sense considering both the weak field nature of the water ligands as well the  $C_{3v}$  symmetry of the species.

## 2. $[\text{Fe}(\text{O})(\text{H}_2\text{O})_5]^{2+}$ : CASPT2(10,8)

CAS: 3d of Fe, 2p of O

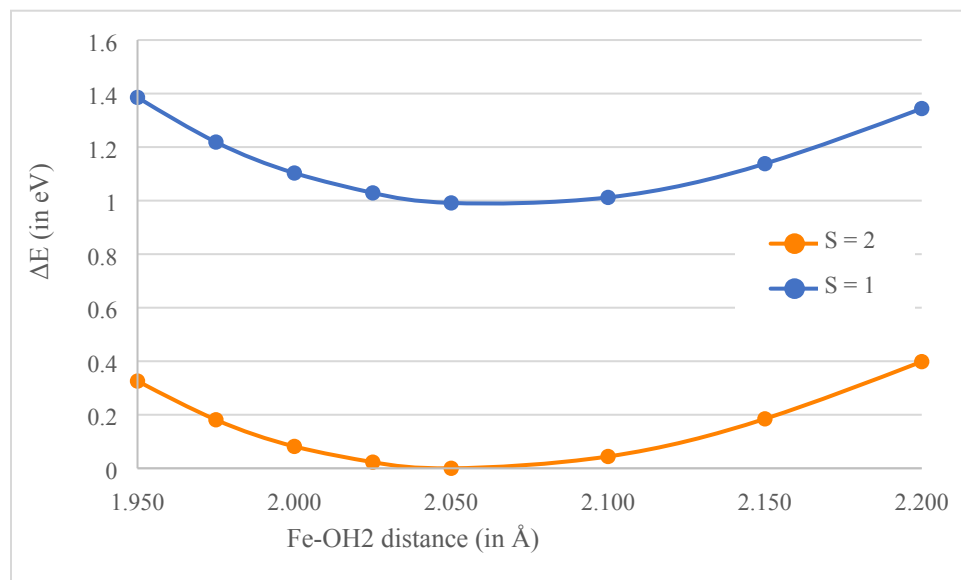

**Figure S2:** Potential energy curves for the symmetric dissociation of the three Fe-O bonds of  $[\text{Fe}(\text{O})(\text{H}_2\text{O})_5]^{2+}$  (pseudo- $C_{4v}$  symmetry).

Similarly, the weak field of the water ligands favors the quintet at all distances over the scan, with the minimum being at 2.050 Å.

### 3. $[\text{Fe}(\text{O})(\text{H}_2\text{O})_{\text{ax}}(\text{NH}_3)_3]^{2+}$ : RASPT2(22,14)

RAS1: 3s3p of Fe, 2s of O, lone pair of  $\text{NH}_3$

RAS2: 3d of Fe, 2p of O

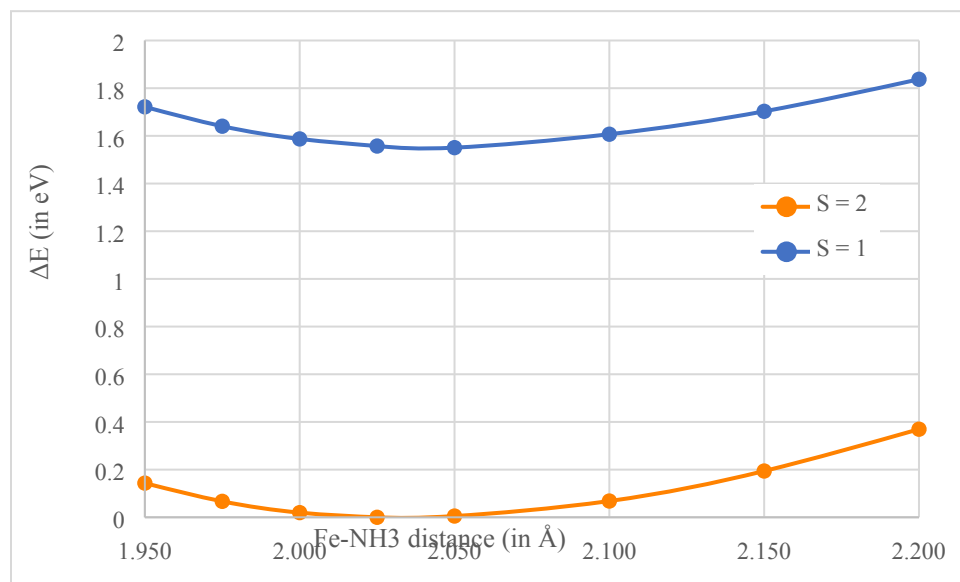

**Figure S3:** Potential energy curves for the symmetric dissociation of the three Fe-O bonds of  $[\text{Fe}(\text{O})(\text{H}_2\text{O})_{\text{ax}}(\text{NH}_3)_3]^{2+}$  (pseudo- $C_{3v}$  symmetry).

The quintet spin state is the ground state for  $[\text{Fe}(\text{O})(\text{H}_2\text{O})_{\text{ax}}(\text{NH}_3)_3]^{2+}$ , with the difference that this time a stronger field formed by ammonia ligands is applied. The pseudo- $C_{3v}$  geometry stabilizes the quintet state over the triplet state, similarly to the  $[\text{Fe}^{\text{IV}}(\text{O})(\text{TMG}_3\text{tren})]^{2+}$  species.<sup>5</sup> This biomimetic molecular complex has its minimum at 2.050 Å for the Fe-N bond distances on the equatorial plane.

### 4. $[\text{Fe}(\text{O})(\text{H}_2\text{O})_{\text{ax}}(\text{NH}_3)_4]^{2+}$ ACTIVE SPACE: RASPT2(24,15)

RAS1: 3s3p of Fe, 2s of O, lone pairs of  $\text{NH}_3$  (x2)

RAS2: 3d of Fe, 2p of O

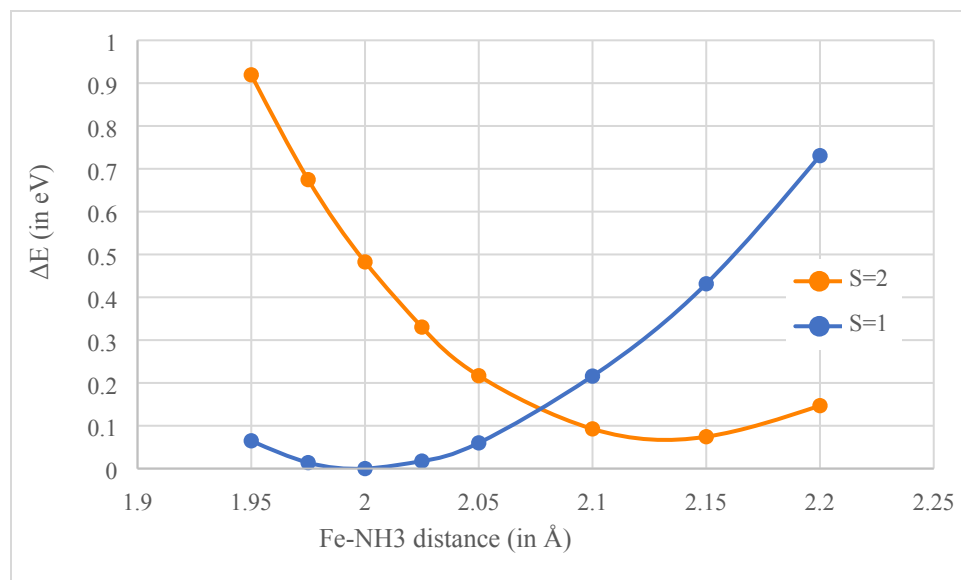

**Figure S4:** Potential energy curves for the symmetric dissociation of the three Fe-O bonds of  $[\text{Fe}(\text{O})(\text{H}_2\text{O})_{\text{ax}}(\text{NH}_3)_4]^{2+}$  (pseudo- $C_{4v}$  symmetry).

In the case of the pseudo- $C_{4h}$  species, the triplet state is preferred with a ground state, with a Fe-NH<sub>3</sub> bond distance of 2.000 Å. For this system, the SA-RASSCF/MS-RASPT2 level was applied with 3 roots for the quintet and 6 roots for the triplet calculation, since those states are degenerate/dear-degenerate at the specific Fe-NH<sub>3</sub> bond range.

### 5. $[\text{Fe}(\text{O})(\text{NH}_3)_4]^{2+}$ : RASPT2(24,15)

RAS1: 3s3p of Fe, 2s of O, lone pair of NH<sub>3</sub> (x2)

RAS2: 3d of Fe, 2p of O



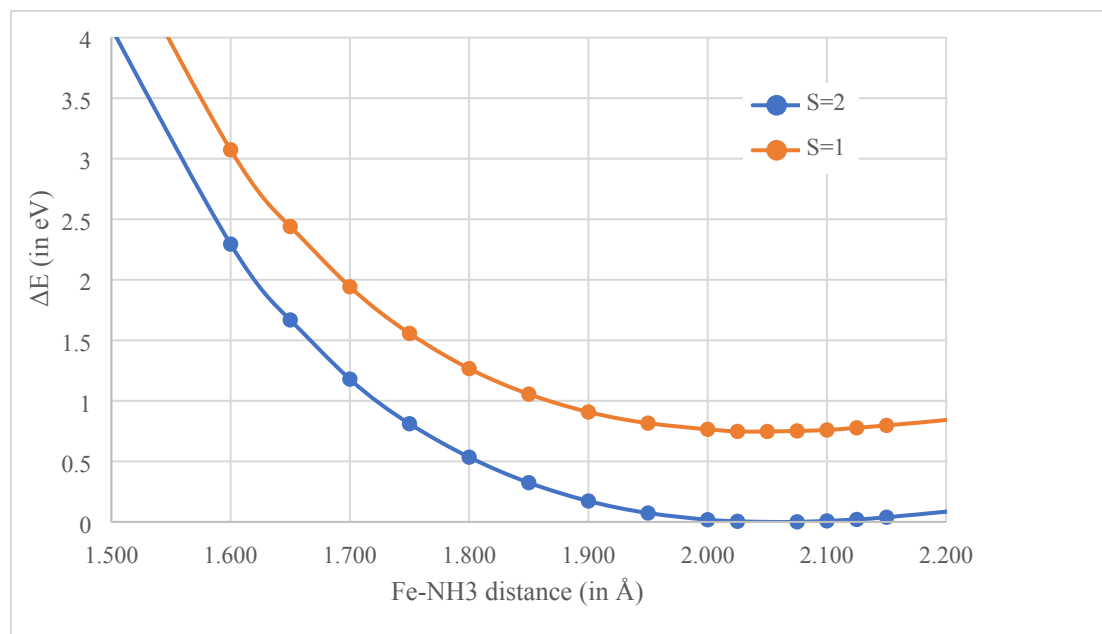

**Figure S5:** Potential energy curves for the symmetric dissociation of the three Fe-O bonds of  $[\text{Fe}(\text{O})(\text{NH}_3)_4]^{2+}$  (pseudo- $C_{3v}$  symmetry).

The pseudo- $C_{3v}$  symmetry, despite the presence of strong field ligands, has a more stable quintet spin state than the triplet. In this case, the equilibrium Fe-N bond distance on the equatorial plane is 2.050 Å.

### S3. Bare [FeO]<sup>2+</sup> Results from MRCI

Spectroscopic constants, equilibrium bond lengths, and excitation energies of all twenty-seven states at the MRCI and MRCI+Q level are reported in Table S4, while their CI vectors are listed in Table S5. MOs that included in the active space for the MRCI calculations are shown in Figure S6.

| State                   | Method | $-E_e$      | $r_e$ | $\omega_e$ | $\Delta G_{1/2}$ | $\omega_e x_e$ | $\alpha_e$ | $T_e$ |
|-------------------------|--------|-------------|-------|------------|------------------|----------------|------------|-------|
| <sup>3</sup> $\Delta$   | MRCI   | 1336.838198 | 2.108 | 344        | 339              | 2.4            | 0.0018     | 0     |
|                         | MRCI+Q | 1336.855001 | 2.101 | 343        | 339              | 2.4            | 0.0022     | 0     |
| <sup>5</sup> $\Delta$   | MRCI   | 1336.837437 | 2.150 | 357        | 352              | 2.6            | 0.0021     | 167   |
|                         | MRCI+Q | 1336.853835 | 2.146 | 358        | 353              | 2.5            | 0.0029     | 256   |
| <sup>7</sup> $\Delta$   | MRCI   | 1336.835622 | 2.197 | 368        | 362              | 3.1            | 0.0029     | 565   |
|                         | MRCI+Q | 1336.852080 | 2.194 | 370        | 364              | 3.2            | 0.0023     | 641   |
| <sup>7</sup> $\Pi$      | MRCI   | 1336.834437 | 2.131 | 342        | 338              | 2.3            | 0.0034     | 826   |
|                         | MRCI+Q | 1336.851269 | 2.115 | 341        | 337              | 2.1            | 0.0016     | 819   |
| <sup>5</sup> $\Pi$      | MRCI   | 1336.834246 | 2.140 | 334        | 328              | 3.2            | 0.0029     | 867   |
|                         | MRCI+Q | 1336.850951 | 2.129 | 334        | 325              | 3.9            | 0.0017     | 889   |
| <sup>3</sup> $\Pi$      | MRCI   | 1336.834067 | 2.152 | 341        | 338              | 2.4            | 0.0036     | 907   |
|                         | MRCI+Q | 1336.850741 | 2.145 | 342        | 341              | 2.2            | 0.0021     | 935   |
| <sup>3</sup> $\Sigma^-$ | MRCI   | 1336.826154 | 2.247 | 308        | 302              | 2.5            | 0.0026     | 2643  |
|                         | MRCI+Q | 1336.842858 | 2.236 | 311        | 305              | 2.4            | 0.0025     | 2665  |
| <sup>5</sup> $\Sigma^-$ | MRCI   | 1336.824410 | 2.280 | 310        | 305              | 2.5            | 0.0025     | 3026  |
|                         | MRCI+Q | 1336.840671 | 2.270 | 313        | 308              | 2.4            | 0.0027     | 3145  |
| <sup>7</sup> $\Sigma^-$ | MRCI   | 1336.822158 | 2.320 | 311        | 305              | 2.7            | 0.0028     | 3520  |
|                         | MRCI+Q | 1336.837489 | 2.312 | 314        | 309              | 2.6            | 0.0030     | 3843  |
| <sup>5</sup> $\Sigma^+$ | MRCI   | 1336.810998 | 1.647 | 629        | 590              | 21.9           | 0.0147     | 5970  |
|                         | MRCI+Q | 1336.836551 | 1.634 | 701        | 653              | 21.7           | 0.0102     | 4049  |
| <sup>3</sup> $\Pi$      | MRCI   | 1336.800547 | 1.855 | 282        | 252              | 1.5            | 0.0139     | 8263  |
|                         | MRCI+Q | 1336.816436 | 1.835 | 325        | 314              | 4.0            | 0.0180     | 8464  |
| <sup>3</sup> $\Phi$     | MRCI   | 1336.800454 | 1.655 | 190        | 183              | -3.1           | 0.0237     | 8284  |

|              |        |             |       |     |     |     |         |       |
|--------------|--------|-------------|-------|-----|-----|-----|---------|-------|
|              | MRCI+Q | 1336.816313 | 1.630 | 298 | 367 | 4.6 | 0.0345  | 8491  |
| $^3\Sigma^+$ | MRCI   | 1336.796459 | 2.036 | 278 | 308 | 4.7 | -0.0015 | 9161  |
|              | MRCI+Q | 1336.814915 | 2.026 | 303 | 340 | 6.8 | -0.0027 | 8798  |
| $^3\Delta$   | MRCI   | 1336.796126 | 1.945 | 267 | 216 | 2.7 | 0.0098  | 9234  |
|              | MRCI+Q | 1336.814626 | 1.924 | 292 | 251 | 4.3 | 0.0130  | 8861  |
| $^5\Phi$     | MRCI   | 1336.794840 | 2.122 | 267 | 258 | 3.9 | 0.0048  | 9516  |
|              | MRCI+Q | 1336.813600 | 2.105 | 269 | 262 | 3.6 | 0.0055  | 9086  |
| $^5\Pi$      | MRCI   | 1336.794705 | 2.132 | 269 | 261 | 4.0 | 0.0047  | 9545  |
|              | MRCI+Q | 1336.813368 | 2.118 | 273 | 265 | 3.9 | 0.0050  | 9137  |
| $^3\Sigma^-$ | MRCI   | 1336.793511 | 2.114 | 267 | 259 | 4.1 | 0.0049  | 9808  |
|              | MRCI+Q | 1336.812455 | 2.100 | 269 | 261 | 3.9 | 0.0056  | 9338  |
| $^7\Sigma^+$ | MRCI   | 1336.793451 | 2.090 | 273 | 267 | 4.5 | 0.0034  | 9821  |
|              | MRCI+Q | 1336.812353 | 2.058 | 269 | 284 | 2.8 | 0.0015  | 9360  |
| $^5\Delta$   | MRCI   | 1336.791094 | 2.208 | 258 | 248 | 4.6 | 0.0053  | 10338 |
|              | MRCI+Q | 1336.810391 | 2.199 | 262 | 253 | 4.4 | 0.0051  | 9791  |
| $^7\Pi$      | MRCI   | 1336.790566 | 2.288 | 250 | 240 | 4.6 | 0.0053  | 10454 |
|              | MRCI+Q | 1336.808828 | 2.281 | 254 | 245 | 4.5 | 0.0051  | 10134 |
| $^5\Sigma^-$ | MRCI   | 1336.790032 | 2.233 | 249 | 239 | 4.6 | 0.0058  | 10571 |
|              | MRCI+Q | 1336.809134 | 2.226 | 252 | 243 | 4.4 | 0.0049  | 10067 |
| $^7\Phi$     | MRCI   | 1336.789723 | 2.282 | 251 | 241 | 4.6 | 0.0048  | 10639 |
|              | MRCI+Q | 1336.808386 | 2.275 | 256 | 246 | 4.5 | 0.0049  | 10231 |
| $^7\Pi$      | MRCI   | 1336.788948 | 2.299 | 238 | 229 | 4.7 | 0.0061  | 10809 |
|              | MRCI+Q | 1336.807631 | 2.287 | 244 | 235 | 4.7 | 0.0055  | 10396 |
| $^5\Pi$      | MRCI   | 1336.788165 | 2.242 | 192 | 186 | 2.5 | 0.0032  | 10981 |
|              | MRCI+Q | 1336.807427 | 2.203 | 189 | 184 | 1.7 | 0.0035  | 10441 |
| $^7\Delta$   | MRCI   | 1336.787322 | 2.354 | 227 | 218 | 4.7 | 0.0051  | 11166 |
|              | MRCI+Q | 1336.804966 | 2.351 | 230 | 221 | 4.6 | 0.0048  | 10981 |
| $^7\Sigma^-$ | MRCI   | 1336.786821 | 2.367 | 223 | 213 | 4.7 | 0.0053  | 11276 |
|              | MRCI+Q | 1336.804146 | 2.365 | 225 | 216 | 4.6 | 0.0054  | 11161 |
| $^3\Pi$      | MRCI   | 1336.786701 | 2.316 | 198 | 190 | 3.8 | 0.0052  | 11302 |
|              | MRCI+Q | 1336.805406 | 2.292 | 202 | 195 | 3.6 | 0.0043  | 10885 |

**Table S4:** Electronic energy  $E_e$  (a.u.), equilibrium bond lengths  $r_e$  (Å), harmonic vibrational frequency  $\omega_e$  ( $\text{cm}^{-1}$ ), energy difference between the ground and first excited vibrational energy levels  $\Delta G_{1/2}$  ( $\text{cm}^{-1}$ ), anharmonicity  $\omega_e x_e$  ( $\text{cm}^{-1}$ ), rovibrational coupling constant  $\alpha_e$  ( $\text{cm}^{-1}$ ), and excitation energies  $T_e$  ( $\text{cm}^{-1}$ ) for twenty seven electronic states of  $^{56}\text{Fe}^{16}\text{O}^{2+}$ .

| State        | Electronic configuration |            |            |            |            |           |           |           |           |              |              |
|--------------|--------------------------|------------|------------|------------|------------|-----------|-----------|-----------|-----------|--------------|--------------|
|              |                          | 1 $\sigma$ | 2 $\sigma$ | 3 $\sigma$ | 4 $\sigma$ | 1 $\pi_x$ | 2 $\pi_x$ | 1 $\pi_y$ | 2 $\pi_y$ | 1 $\delta_+$ | 1 $\delta_-$ |
| $^3\Delta$   | 0.38                     | 2          | 2          | $\alpha$   | 0          | $\beta$   | $\alpha$  | $\beta$   | $\alpha$  | $\alpha$     | 2            |
|              | -0.34                    | 2          | 2          | $\alpha$   | 0          | $\beta$   | $\alpha$  | 2         | 0         | $\alpha$     | 2            |
|              | -0.34                    | 2          | 2          | $\alpha$   | 0          | 2         | 0         | $\beta$   | $\alpha$  | $\alpha$     | 2            |
| $^5\Delta$   | 0.56                     | 2          | 2          | $\alpha$   | 0          | $\beta$   | $\alpha$  | $\alpha$  | $\alpha$  | $\alpha$     | 2            |
|              | 0.45                     | 2          | 2          | $\alpha$   | 0          | $\alpha$  | $\alpha$  | $\beta$   | $\alpha$  | $\alpha$     | 2            |
| $^7\Delta$   | 0.98                     | 2          | 2          | $\alpha$   | 0          | $\alpha$  | $\alpha$  | $\alpha$  | $\alpha$  | $\alpha$     | 2            |
| $^7\Pi$      | 0.96                     | 2          | 2          | $\alpha$   | 0          | $\alpha$  | $\alpha$  | $\alpha$  | 2         | $\alpha$     | $\alpha$     |
| $^5\Pi$      | 0.52                     | 2          | 2          | $\alpha$   | 0          | $\beta$   | $\alpha$  | $\alpha$  | 2         | $\alpha$     | $\alpha$     |
|              | 0.48                     | 2          | 2          | $\alpha$   | 0          | $\alpha$  | $\alpha$  | $\beta$   | 2         | $\alpha$     | $\alpha$     |
| $^3\Pi$      | 0.43                     | 2          | 2          | $\alpha$   | 0          | $\beta$   | $\alpha$  | $\beta$   | 2         | $\alpha$     | $\alpha$     |
|              | -0.38                    | 2          | 2          | $\alpha$   | 0          | 2         | 0         | $\beta$   | 2         | $\alpha$     | $\alpha$     |
|              | -0.31                    | 2          | 2          | $\alpha$   | 0          | $\beta$   | $\alpha$  | 2         | $\beta$   | $\alpha$     | $\alpha$     |
| $^3\Sigma^-$ | 0.33                     | 2          | 2          | 2          | 0          | $\beta$   | $\alpha$  | $\beta$   | $\alpha$  | $\alpha$     | $\alpha$     |
|              | -0.33                    | 2          | 2          | 2          | 0          | 2         | 0         | $\beta$   | $\alpha$  | $\alpha$     | $\alpha$     |
|              | -0.33                    | 2          | 2          | 2          | 0          | $\beta$   | $\alpha$  | 2         | 0         | $\alpha$     | $\alpha$     |
|              | 0.33                     | 2          | 2          | 2          | 0          | 2         | 0         | 2         | 0         | $\alpha$     | $\alpha$     |
| $^5\Sigma^-$ | 0.54                     | 2          | 2          | 2          | 0          | $\beta$   | $\alpha$  | $\alpha$  | $\alpha$  | $\alpha$     | $\alpha$     |
| $^7\Sigma^-$ | 1.00                     | 2          | 2          | 2          | 0          | $\alpha$  | $\alpha$  | $\alpha$  | $\alpha$  | $\alpha$     | $\alpha$     |
| $^5\Sigma^+$ | 0.74                     | 2          | 2          | 0          | 0          | 2         | $\alpha$  | 2         | $\alpha$  | $\alpha$     | $\alpha$     |
| $^3\Pi$      | 0.63                     | 2          | 2          | $\alpha$   | 0          | 2         | $\beta$   | 2         | 0         | $\alpha$     | $\alpha$     |
| $^3\Phi$     | -0.53                    | 2          | 2          | 0          | 0          | 2         | $\alpha$  | 2         | 0         | 2            | $\alpha$     |
|              | 0.53                     | 2          | 2          | 0          | 0          | 2         | 0         | 2         | $\alpha$  | $\alpha$     | 2            |
| $^3\Sigma^+$ | 0.39                     | 2          | 2          | 0          | 0          | 2         | $\alpha$  | $\beta$   | 2         | $\alpha$     | $\alpha$     |
| $^3\Delta$   | -0.34                    | 2          | 2          | 0          | 0          | 2         | $\alpha$  | 2         | $\beta$   | $\alpha$     | $\alpha$     |
| $^5\Phi$     | 0.31                     | 2          | $\alpha$   | $\alpha$   | 0          | $\alpha$  | $\alpha$  | 2         | $\alpha$  | $\beta$      | 2            |
|              | 0.31                     | 2          | 2          | 0          | 0          | $\alpha$  | $\alpha$  | 2         | $\alpha$  | $\alpha$     | 2            |
|              | -0.31                    | 2          | 2          | 0          | 0          | 2         | $\alpha$  | $\alpha$  | $\alpha$  | 2            | $\alpha$     |
| $^5\Pi$      | 0.32                     | 2          | $\alpha$   | $\alpha$   | 0          | 2         | $\alpha$  | $\beta$   | $\alpha$  | $\alpha$     | 2            |

|              |       |   |          |          |   |          |          |          |          |          |          |
|--------------|-------|---|----------|----------|---|----------|----------|----------|----------|----------|----------|
|              | -0.31 | 2 | $\alpha$ | $\alpha$ | 0 | 2        | $\alpha$ | $\alpha$ | $\alpha$ | $\beta$  | 2        |
|              | -0.31 | 2 | 2        | 0        | 0 | 2        | $\alpha$ | $\alpha$ | $\alpha$ | $\alpha$ | 2        |
|              | 0.31  | 2 | 2        | 0        | 0 | $\alpha$ | $\alpha$ | 2        | $\alpha$ | 2        | $\alpha$ |
| $^3\Sigma^-$ | 0.28  | 2 | 2        | 0        | 0 | 2        | 2        | $\beta$  | $\alpha$ | $\alpha$ | $\alpha$ |
|              | 0.28  | 2 | 2        | 0        | 0 | $\beta$  | $\alpha$ | 2        | 2        | $\alpha$ | $\alpha$ |
|              | -0.27 | 2 | 2        | 0        | 0 | 2        | 0        | 2        | 2        | $\alpha$ | $\alpha$ |
|              | -0.27 | 2 | 2        | 0        | 0 | 2        | 2        | 2        | 0        | $\alpha$ | $\alpha$ |
| $^7\Sigma^+$ | 0.68  | 2 | $\alpha$ | $\alpha$ | 0 | 2        | $\alpha$ | $\alpha$ | 2        | $\alpha$ | $\alpha$ |
|              | 0.68  | 2 | $\alpha$ | $\alpha$ | 0 | $\alpha$ | 2        | 2        | $\alpha$ | $\alpha$ | $\alpha$ |
| $^5\Delta$   | 0.33  | 2 | $\alpha$ | $\alpha$ | 0 | 2        | $\alpha$ | $\beta$  | 2        | $\alpha$ | $\alpha$ |
|              | -0.33 | 2 | $\alpha$ | $\alpha$ | 0 | 2        | $\alpha$ | $\alpha$ | 2        | $\beta$  | $\alpha$ |
|              | 0.33  | 2 | $\alpha$ | $\alpha$ | 0 | $\alpha$ | 2        | 2        | $\alpha$ | $\beta$  | $\alpha$ |
| $^7\Pi$      | 0.70  | 2 | $\alpha$ | $\alpha$ | 0 | 2        | $\alpha$ | $\alpha$ | $\alpha$ | $\alpha$ | 2        |
|              | 0.70  | 2 | $\alpha$ | $\alpha$ | 0 | $\alpha$ | $\alpha$ | 2        | $\alpha$ | 2        | $\alpha$ |
| $^5\Sigma^-$ | 0.33  | 2 | $\alpha$ | $\alpha$ | 0 | $\alpha$ | $\alpha$ | 2        | 2        | $\beta$  | $\alpha$ |
|              | 0.33  | 2 | $\alpha$ | $\alpha$ | 0 | 2        | 2        | $\alpha$ | $\alpha$ | $\beta$  | $\alpha$ |
| $^7\Phi$     | 0.70  | 2 | $\alpha$ | $\alpha$ | 0 | 2        | $\alpha$ | $\alpha$ | $\alpha$ | $\alpha$ | 2        |
|              | -0.70 | 2 | $\alpha$ | $\alpha$ | 0 | $\alpha$ | $\alpha$ | 2        | $\alpha$ | 2        | $\alpha$ |
| $^7\Pi$      | 0.93  | 2 | $\alpha$ | 2        | 0 | $\alpha$ | $\alpha$ | 2        | $\alpha$ | $\alpha$ | $\alpha$ |
| $^5\Pi$      | 0.46  | 2 | $\alpha$ | 2        | 0 | $\alpha$ | $\alpha$ | 2        | $\alpha$ | $\beta$  | $\alpha$ |
| $^7\Delta$   | -0.71 | 2 | $\alpha$ | $\alpha$ | 0 | 2        | $\alpha$ | $\alpha$ | 2        | $\alpha$ | $\alpha$ |
|              | 0.71  | 2 | $\alpha$ | $\alpha$ | 0 | $\alpha$ | 2        | 2        | $\alpha$ | $\alpha$ | $\alpha$ |
| $^7\Sigma^-$ | 0.71  | 2 | $\alpha$ | $\alpha$ | 0 | $\alpha$ | $\alpha$ | 2        | 2        | $\alpha$ | $\alpha$ |
|              | 0.71  | 2 | $\alpha$ | $\alpha$ | 0 | 2        | 2        | $\alpha$ | $\alpha$ | $\alpha$ | $\alpha$ |
| $^3\Pi$      | 0.30  | 2 | $\alpha$ | 2        | 0 | 2        | 0        | 2        | $\alpha$ | $\beta$  | $\alpha$ |
|              | 0.30  | 2 | 2        | $\beta$  | 0 | 2        | 0        | 2        | $\alpha$ | $\alpha$ | $\alpha$ |

**Table S5:** Dominant electronic configurations for the twenty-seven electronic states of  $\text{FeO}^{2+}$  at the equilibrium geometry.

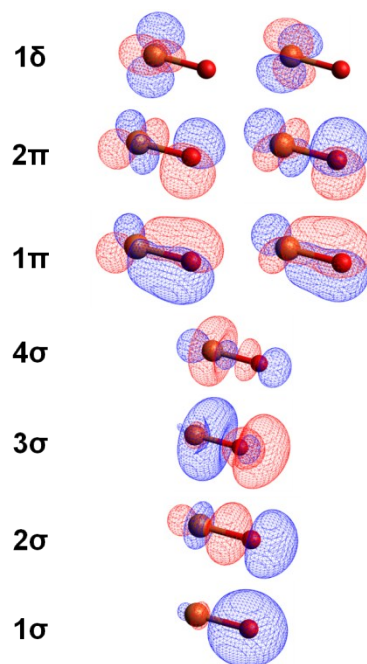

**Figure S6:** Valence molecular orbitals of  $5\Sigma^+$  at its equilibrium bond length.

#### S4. Analysis the of sigma/pi channels

Potential energy curves of quintet (three) and triplet (six) states are plotted for each model complex. Energy differences are shown with respect to the most stable state (quintet or triplet).

##### 1. $[\text{Fe}(\text{O})(\text{H}_2\text{O})_5]^{2+}$ : MS-CASPT2(18,12)

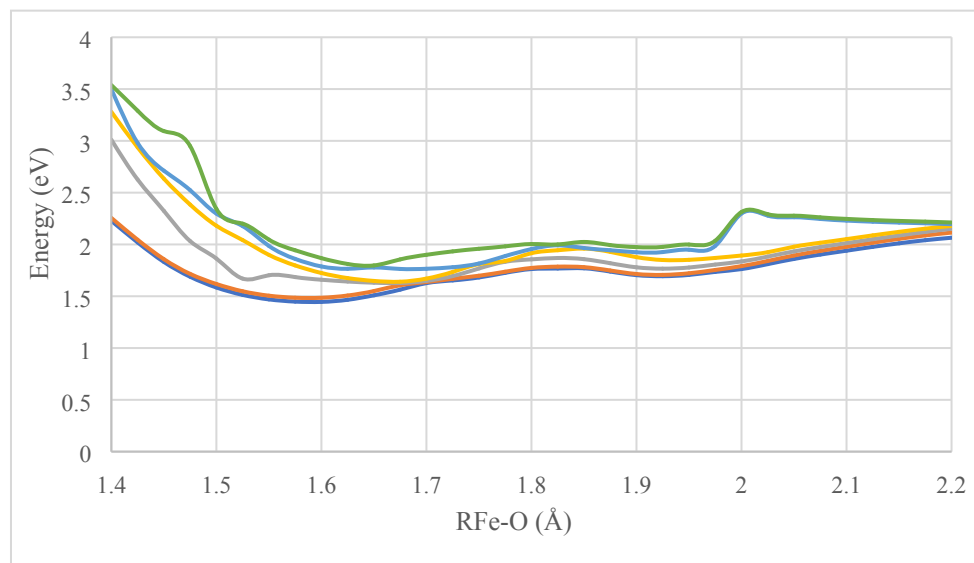

**Figure S7:** Potential energy curves of  $[\text{Fe}(\text{O})(\text{H}_2\text{O})_5]^{2+}$  at the MS-CASPT2(18,12) level for the six lowest triplet states. All energies are shown as differences from the minimum of the quintet ground state.

The second minimum shown in  $R_{\text{Fe-O}} = 1.95 \text{ \AA}$  is due to avoided crossings and issues due to a limited number of multistate CASPT2 calculations with triplet excited states which are less stable at the equilibrium geometry.

Comparison between MS(3)-CASPT2(18,12) and MS(3)-RASPT2(18,12) showed no difference on the three lowest quintet states of  $[\text{Fe}(\text{O})(\text{H}_2\text{O})_5]^{2+}$ .



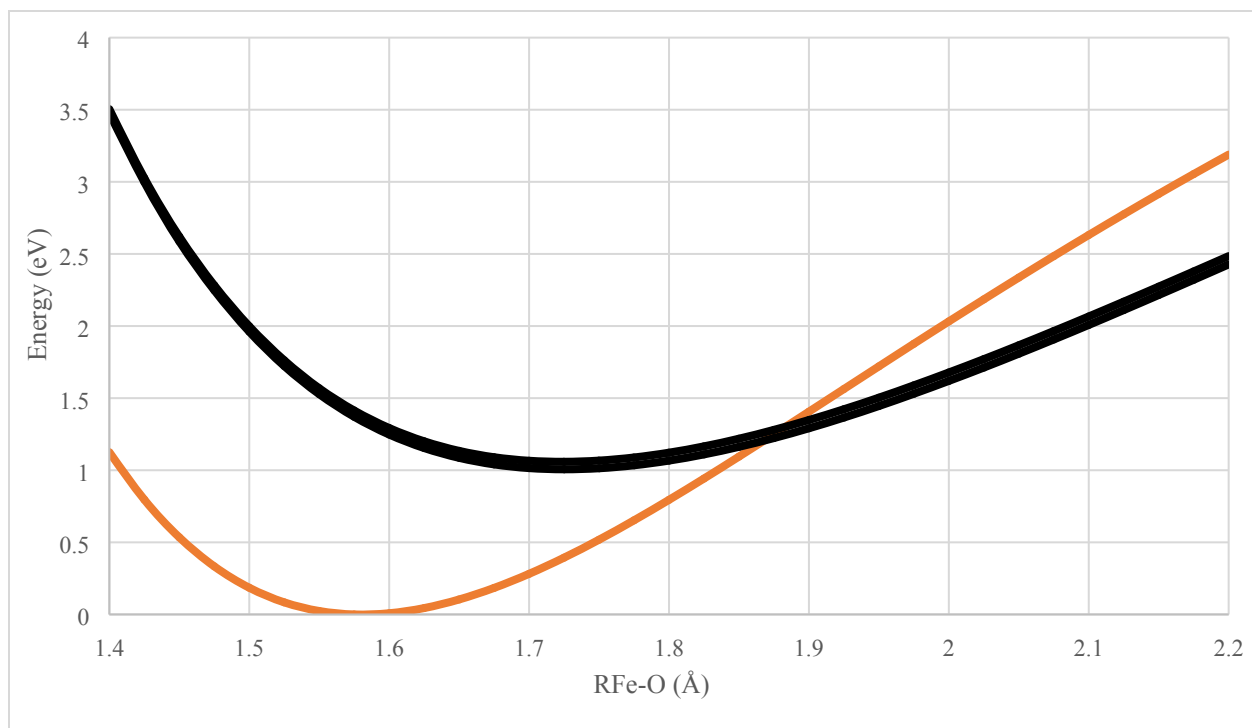

**Figure S8:** Potential energy curve of  $[\text{Fe}(\text{O})(\text{H}_2\text{O})_5]^{2+}$  at the MS(3)-CASPT2(18,12) level.

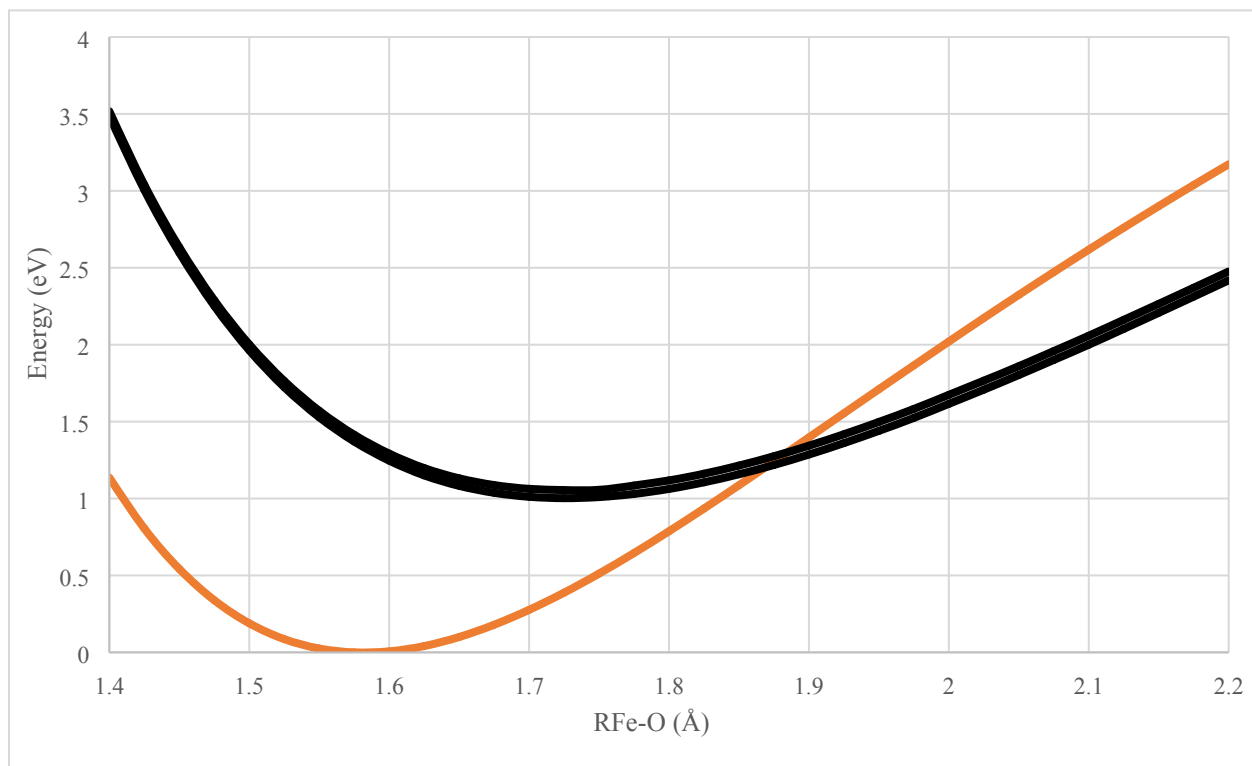

**Figure S9:** Potential energy curve of  $[\text{Fe}(\text{O})(\text{H}_2\text{O})_5]^{2+}$  at the MS(3)-RASPT2(18,12) level.

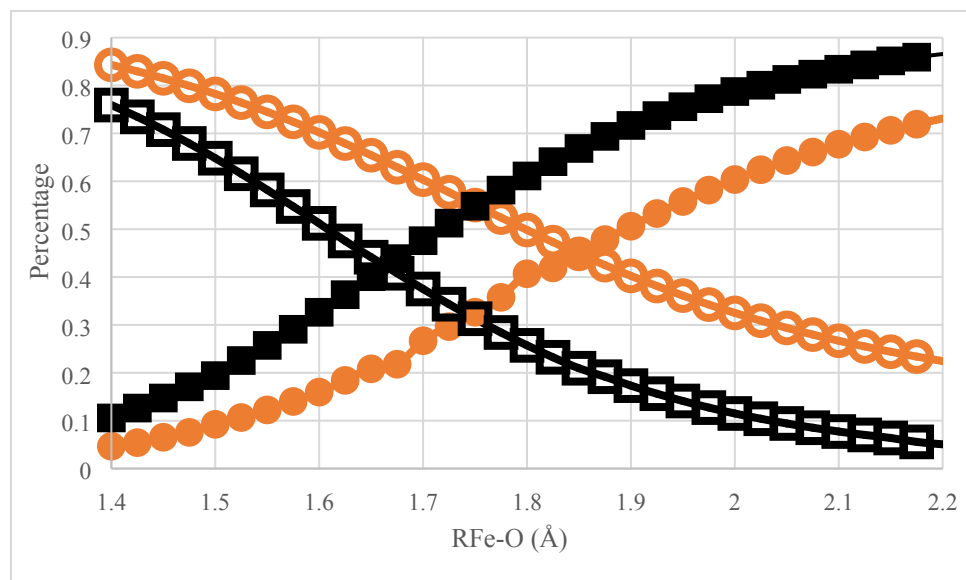

**Figure S10:** The percentage of the wave function for the ground ( ${}^5A$ , orange) and first excited state ( ${}^5E$ , black) of  $[\text{Fe}(\text{O})(\text{H}_2\text{O})_5]^{2+}$  along the Fe-O bond distance which corresponds to the non-reactive Fe(IV)-oxo electronic configuration (open circles and squares, respectively) and to the radical Fe(III)-oxyl configuration (closed circles and squares, respectively).

## 2. $[\text{Fe}(\text{O})(\text{H}_2\text{O})_4]^{2+}$ : MS-CASPT2(20,13)

**Figure S11:** Potential energy curves of  $[\text{Fe}(\text{O})(\text{H}_2\text{O})_4]^{2+}$  at the MS-CASPT2(20,13) level for the three lowest quintet states.

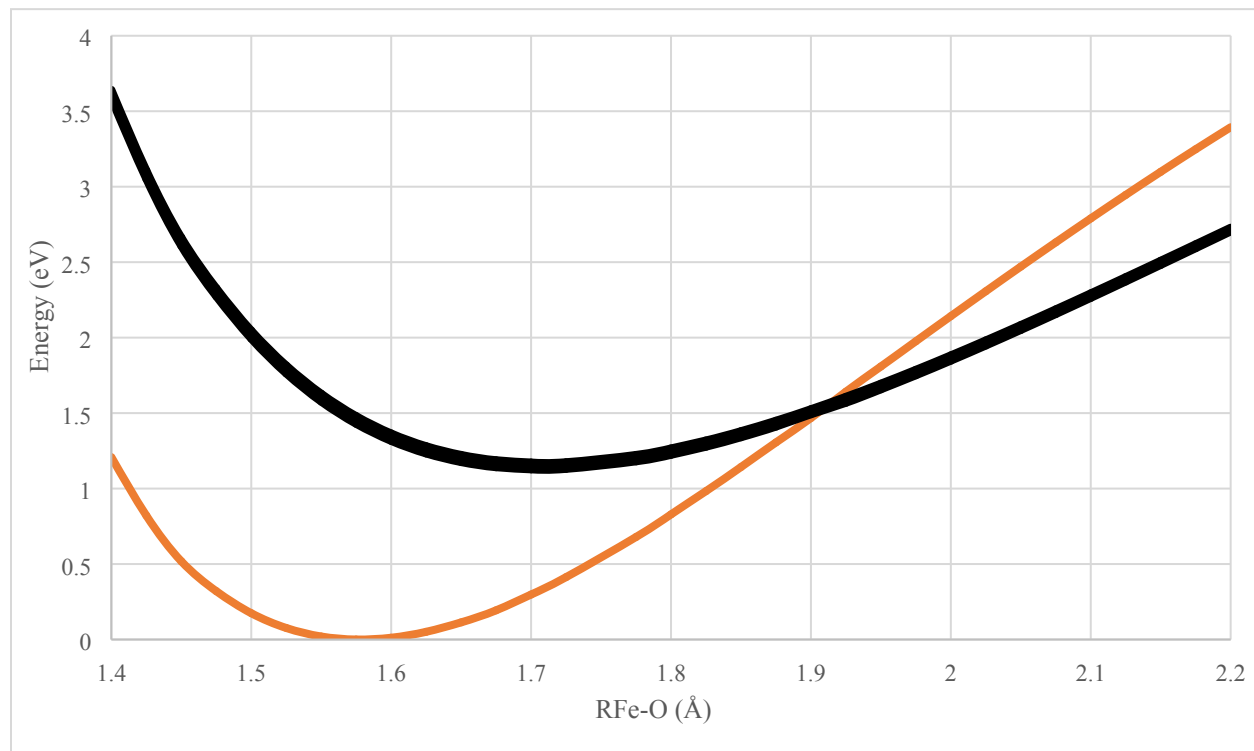

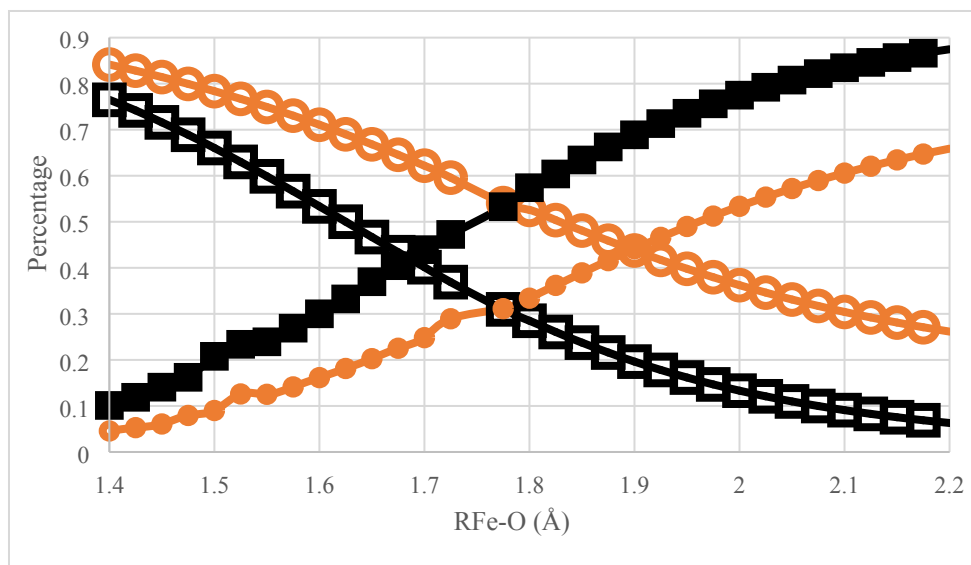

**Figure S12:** The percentage of the wave function for the ground ( ${}^5A$ , orange) and first excited state ( ${}^5E$ , black) of  $[\text{Fe}(\text{O})(\text{H}_2\text{O})_4]^{2+}$  along the Fe-O bond distance which corresponds to the non-reactive Fe(IV)-oxo electronic configuration (open circles and squares, respectively) and to the radical Fe(III)-oxyl configuration (closed circles and squares, respectively).

### 3. $[\text{Fe}(\text{O})(\text{H}_2\text{O})_{\text{ax}}(\text{NH}_3)_3]^{2+}$ : MS-CASPT2(20,13)

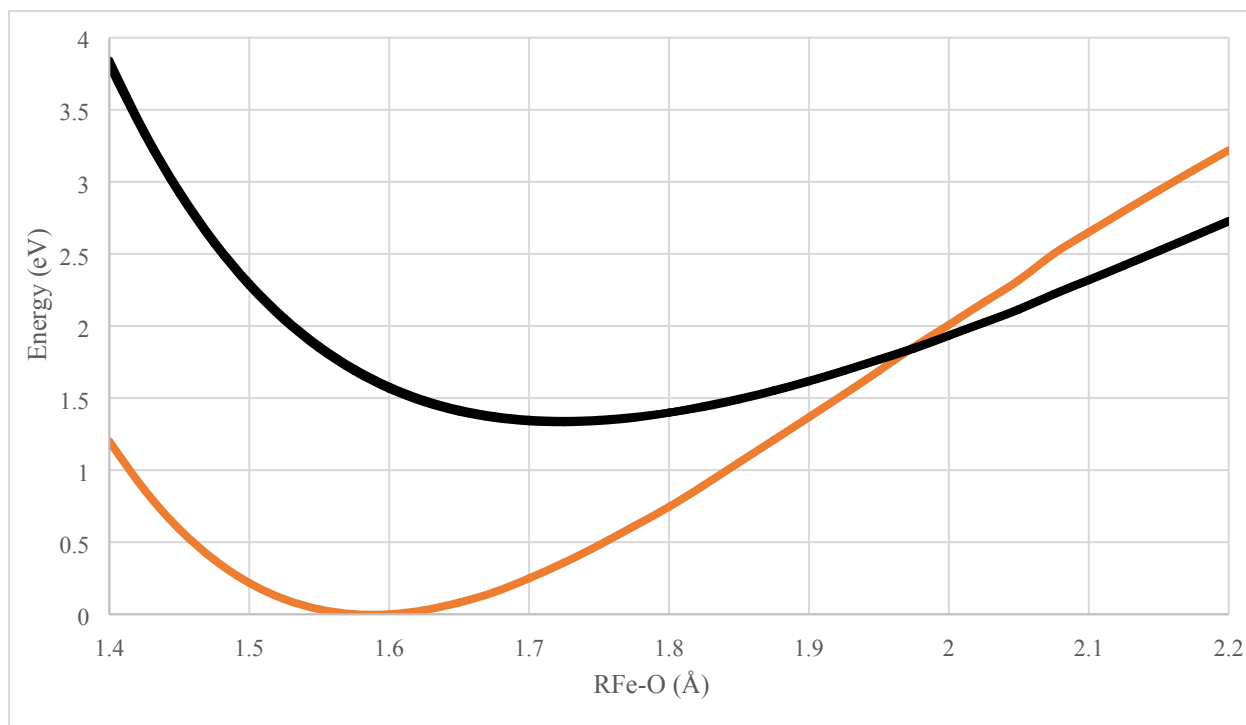

**Figure S13:** Potential energy curves of  $[\text{Fe}(\text{O})(\text{H}_2\text{O})_{\text{ax}}(\text{NH}_3)_3]^{2+}$  at the MS-RASPT2(22,14) level for the three lowest quintet states.

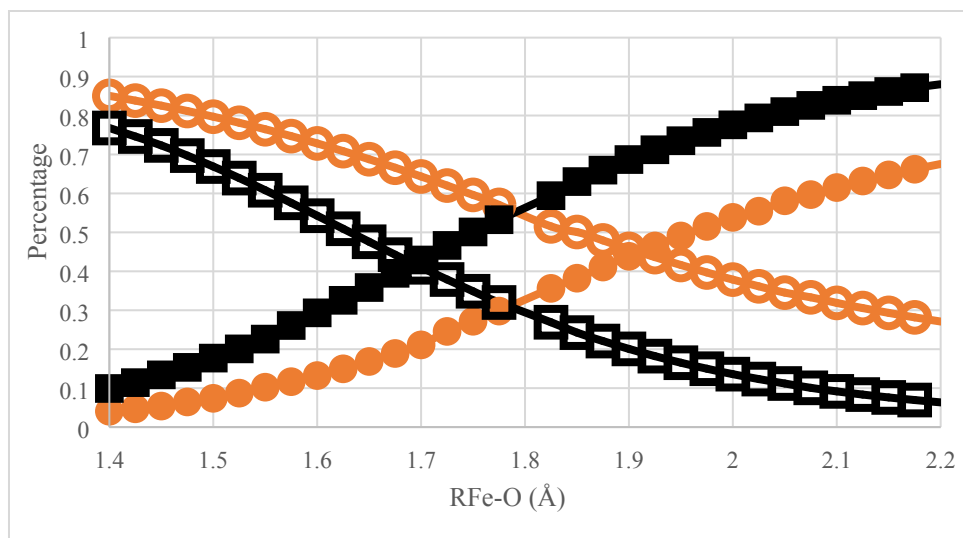

**Figure S14:** The percentage of the wave function for the ground ( ${}^5A$ , orange) and first excited state ( ${}^5E$ , black) of  $[\text{Fe}(\text{O})(\text{H}_2\text{O})_{\text{ax}}(\text{NH}_3)_3]^{2+}$  along the Fe-O bond distance which corresponds to the non-reactive Fe(IV)-oxo electronic configuration (open circles and squares, respectively) and to the radical Fe(III)-oxyl configuration (closed circles and squares, respectively).

#### 4. $[\text{Fe}(\text{O})(\text{H}_2\text{O})_{\text{ax}}(\text{NH}_3)_4]^{2+}$ MS-CASPT2(18,12)

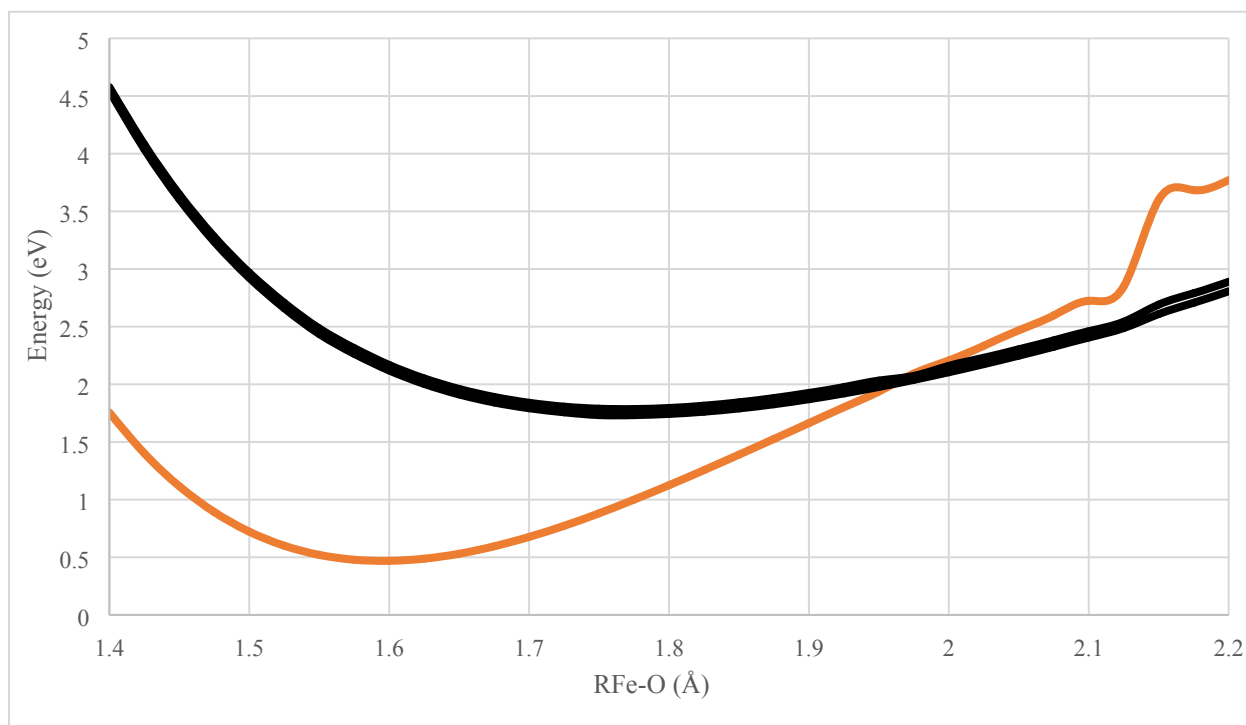

**Figure S15:** Potential energy curves of  $[\text{Fe}(\text{O})(\text{H}_2\text{O})_{\text{ax}}(\text{NH}_3)_4]^{2+}$  at the MS-RASPT2(24,15) level for the three lowest quintet states. All energies are shown as differences from the minimum of the triplet ground state.

The second minimum shown in  $R_{\text{Fe-O}} = 2.15 \text{ \AA}$  is due to avoided crossings and issues due to a limited number of multistate CASPT2 calculations with quintet excited states which are less stable

at the equilibrium geometry. Since the avoided crossings occur beyond the intercrossing of the  $^5A/^5E$  states, they do not affect the analysis of our results.

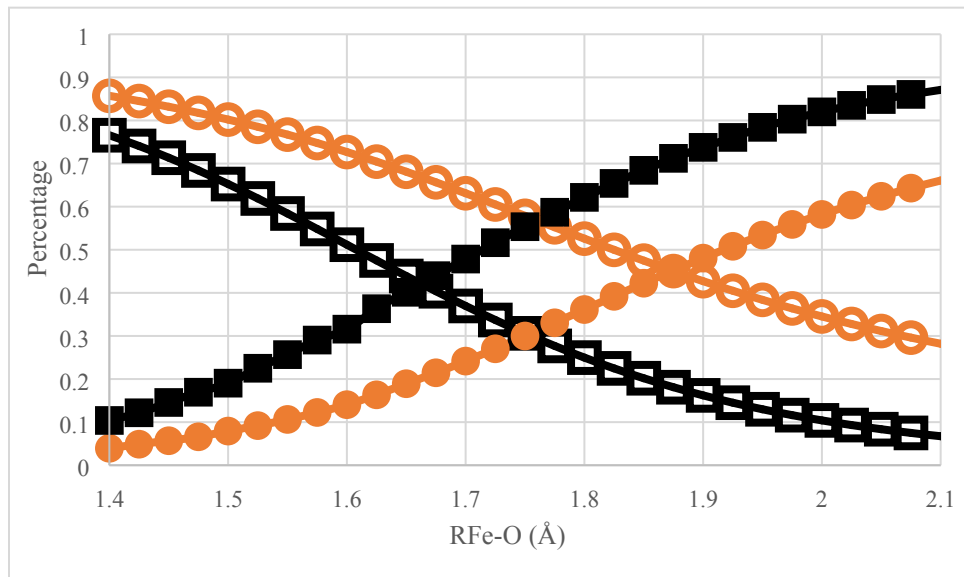

**Figure S16:** The percentage of the wave function for the ground ( $^5A$ , orange) and first excited state ( $^5E$ , black) of  $[\text{Fe}(\text{O})(\text{H}_2\text{O})_{\text{ax}}(\text{NH}_3)_4]^{2+}$  along the Fe-O bond distance which corresponds to the non-reactive Fe(IV)-oxo electronic configuration (open circles and squares, respectively) and to the radical Fe(III)-oxyl configuration (closed circles and squares, respectively).

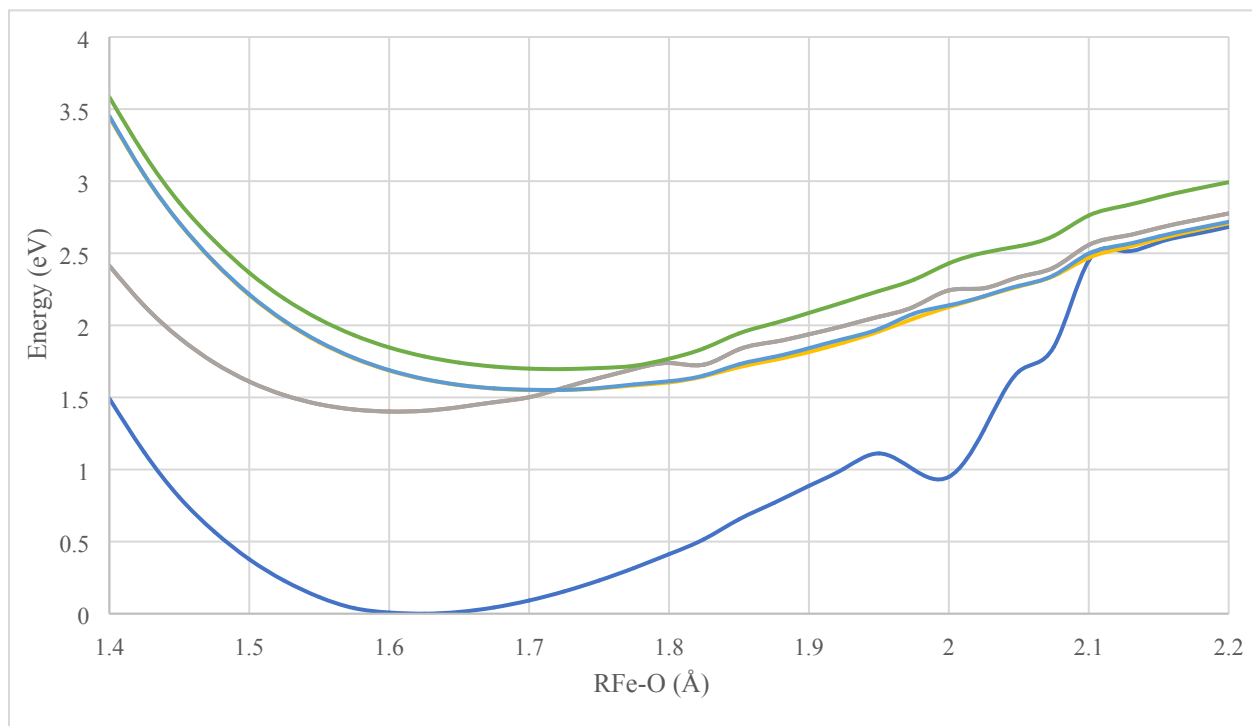

**Figure S17:** Potential energy curves of  $[\text{Fe}(\text{O})(\text{H}_2\text{O})_{\text{ax}}(\text{NH}_3)_3]^{2+}$  at the MS-RASPT2(20,13) level for the six lowest triplet states.

The second minimum shown at  $R_{\text{Fe-O}} = 2.00 \text{ \AA}$  is due to avoided crossings and issues due to a limited number of multistate CASPT2 calculations with triplet excited states which are less stable at the equilibrium geometry.

### 5. $[\text{Fe}(\text{O})(\text{NH}_3)_4]^{2+}$ : MS-CASPT2(20,13)

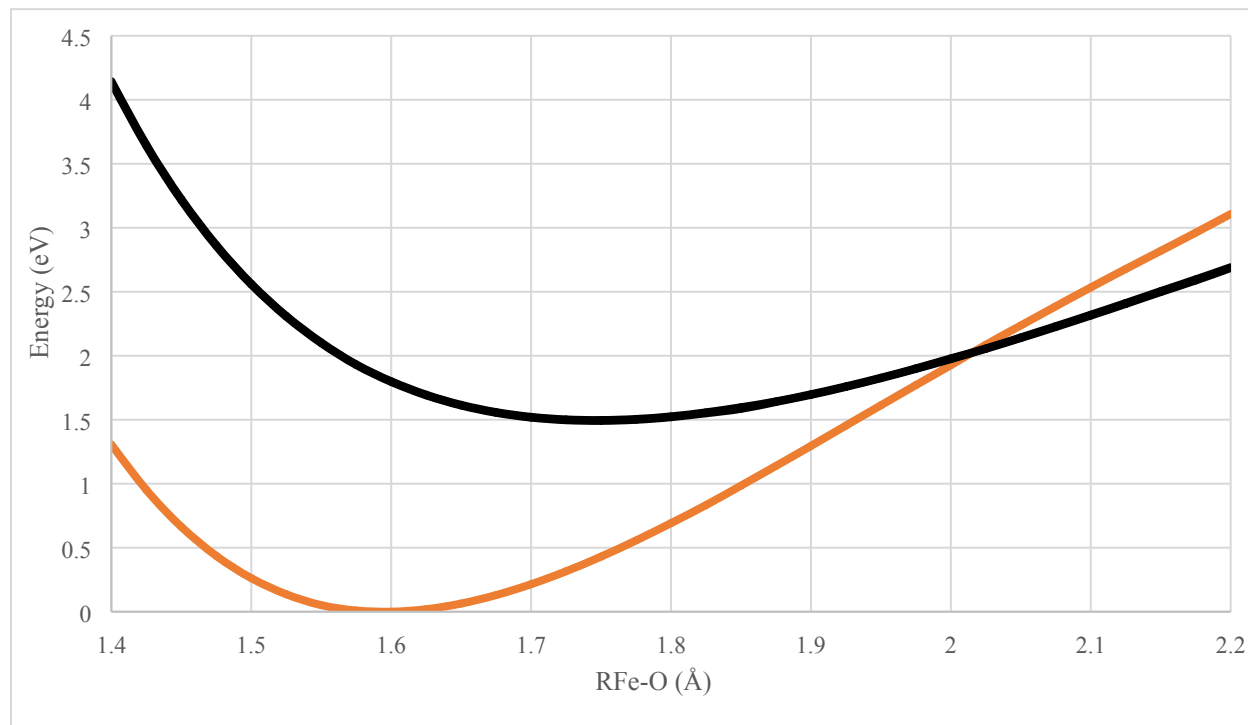

**Figure S18:** Potential energy curves of  $[\text{Fe}(\text{O})(\text{NH}_3)_4]^{2+}$  at the MS-RASPT2(20,13) level for the three lowest quintet states.

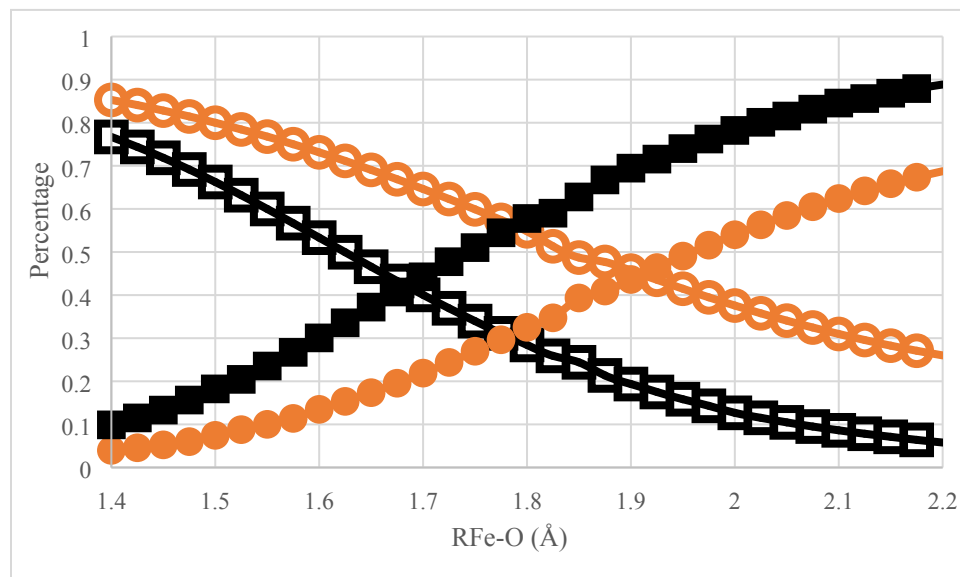

**Figure S19:** The percentage of the wave function for the ground ( ${}^5A$ , orange) and first excited state ( ${}^5E$ , black) of  $[\text{Fe}(\text{O})(\text{NH}_3)_4]^{2+}$  along the Fe-O bond distance which corresponds to the non-reactive Fe(IV)-oxo electronic configuration (open circles and squares, respectively) and to the radical Fe(III)-oxyl configuration (closed circles and squares, respectively).

## 6. $[\text{Fe}(\text{O})(\text{NH}_3)_5]^{2+}$ : MS-CASPT2(18,12)

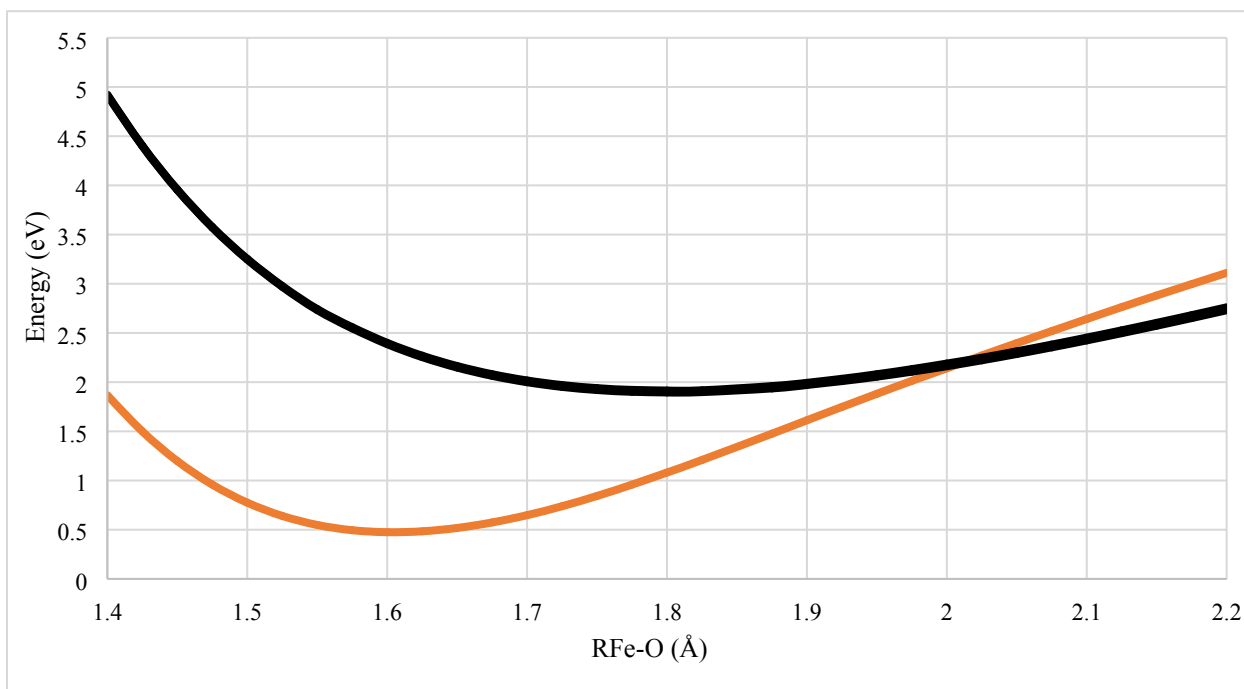

**Figure S20.** Potential energy curves of  $[\text{Fe}(\text{O})(\text{NH}_3)_5]^{2+}$  at the MS-CASPT2(18,12) level for the three lowest quintet states.

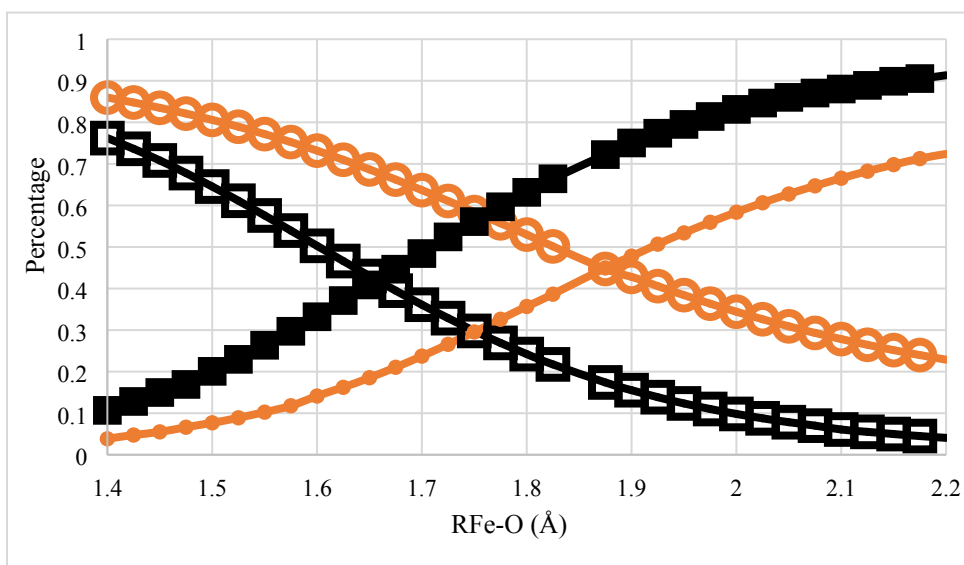

**Figure S21.** The percentage of the wave function for the ground ( ${}^5\text{A}$ , orange) and first excited state ( ${}^5\text{E}$ , black) of  $[\text{Fe}(\text{O})(\text{NH}_3)_5]^{2+}$  along the Fe-O bond distance which corresponds to the non-reactive Fe(IV)-oxo electronic configuration (open circles and squares, respectively) and to the radical Fe(III)-oxyl configuration (closed circles and squares, respectively).

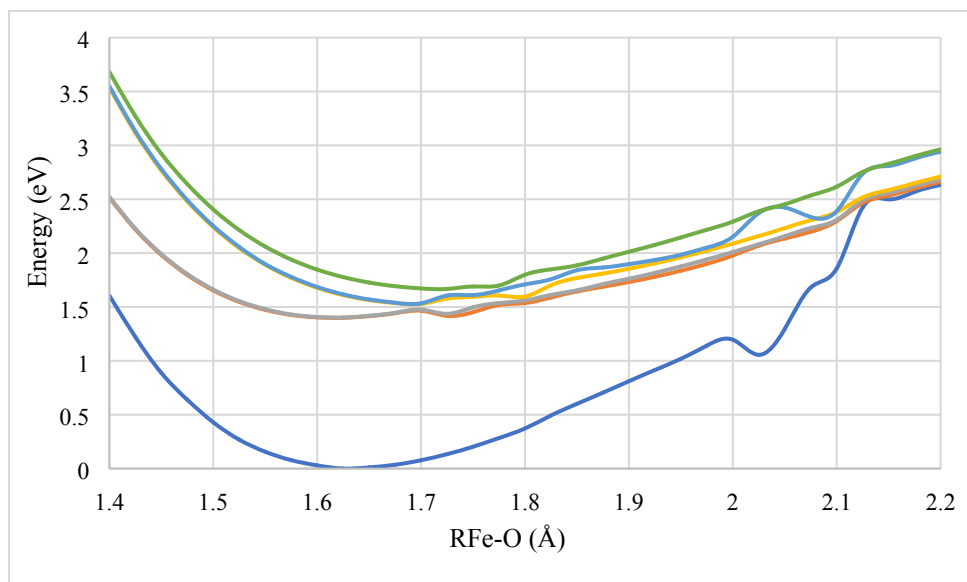

**Figure S22:** Potential energy curves of  $[\text{Fe}(\text{O})(\text{NH}_3)_4]^{2+}$  at the MS-RASPT2(18,12) level for the six lowest triplet states.



## S5. CASSCF/RASSCF Active Spaces

Molecular orbital isosurfaces with a contour value of 0.075 a.u.. All orbitals generated at an  $R_{\text{Fe-O}}$  of 1.6Å.

### 1. $[\text{Fe}(\text{O})(\text{H}_2\text{O})_5]^{2+}$

CAS(18,12)

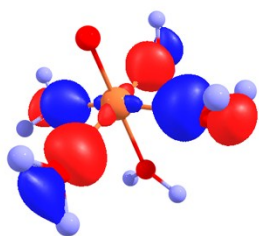

$\sigma$  ( $2p(\text{O})-3d_{x^2-y^2}$ )  
2.00

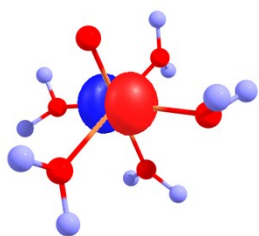

$3p_y$  (Fe)  
2.00

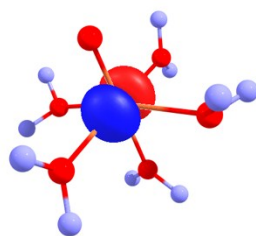

$3p_x$  (Fe)  
2.00

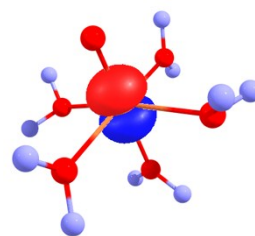

$3p_z$  (Fe)  
2.00

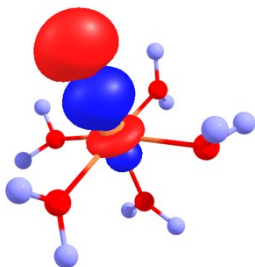

$\sigma$  ( $3d_z^2-2p_z$ )  
1.74

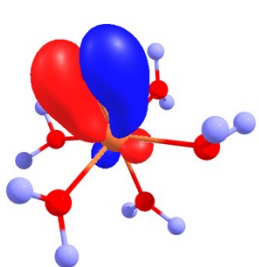

$\pi$  ( $3d_{yz}-2p_y$ )  
1.94

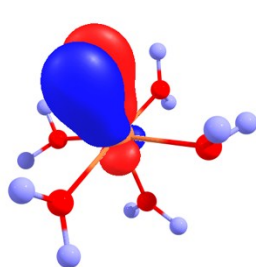

$\pi$  ( $3d_{xz}-2p_x$ )  
1.94

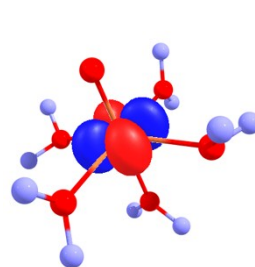

$3d_{xy}$  (Fe)  
1.00

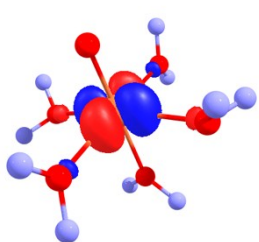

$\sigma^*$  ( $2p(\text{O})-3d_{x^2-y^2}$ )  
1.00

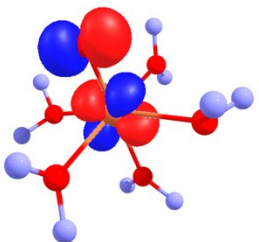

$\pi^*$  ( $3d_{yz}-2p_y$ )  
1.06

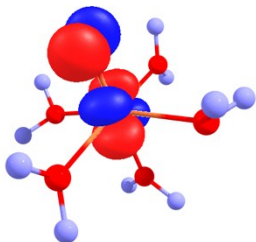

$\pi^*$  ( $3d_{xz}-2p_x$ )  
1.06

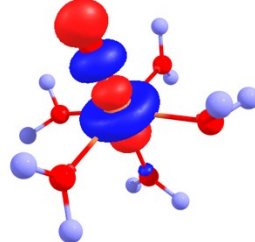

$\sigma^*$  ( $3d_z^2-2p_z$ )  
0.26

## 2. $[\text{Fe}(\text{O})(\text{H}_2\text{O})_4]^{2+}$

CAS(20,13)

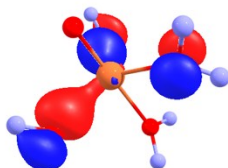

$\sigma (2p(\text{O})-3d_{x^2-y^2})$   
2.00

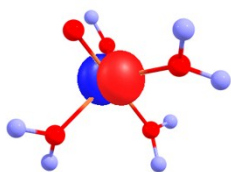

$3p_x(\text{Fe})$

2.00

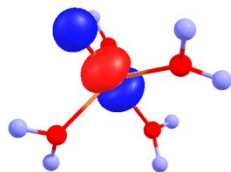

$3p_z(\text{Fe})$

2.00

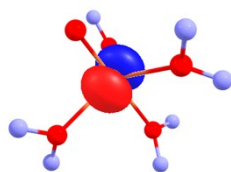

$3p_y(\text{Fe})$

2.00

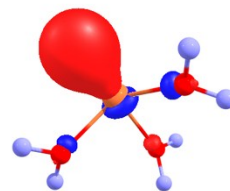

$2s(\text{O})$

2.00

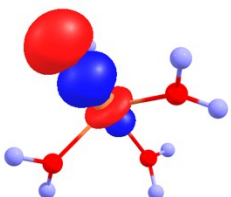

$\sigma (3d_z^2-2p_z)$

1.75

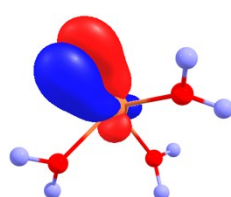

$\pi (3d_{yz}-2p_y)$

1.94

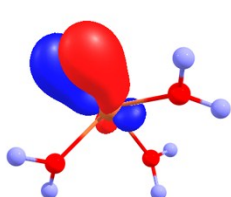

$\pi (3d_{xz}-2p_x)$

1.94

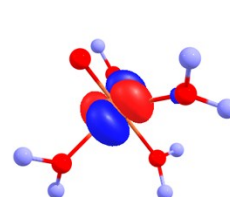

$3d_{xy}(\text{Fe})$

1.00

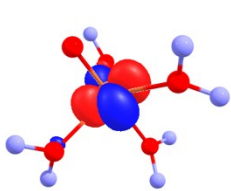

$3d_{x^2-y^2}(\text{Fe})$

1.00

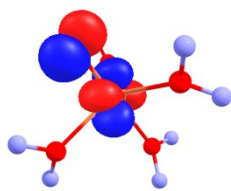

$\pi^*(3d_{yz}-2p_y)$

1.06

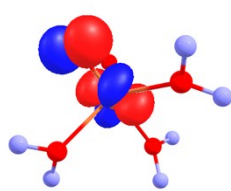

$\pi^*(3d_{xz}-2p_x)$

1.06

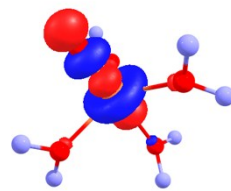

$\sigma^*(3d_{z^2}-2p_z)$

0.26

### 3. $[\text{Fe}(\text{O})(\text{H}_2\text{O})_{\text{ax}}(\text{NH}_3)_3]^{2+}$

CAS(20,13)

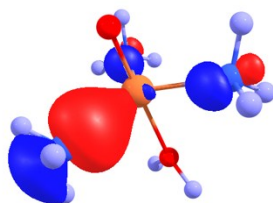

$\sigma(2p(\text{O})-3d_{x^2-y^2})$

2.00

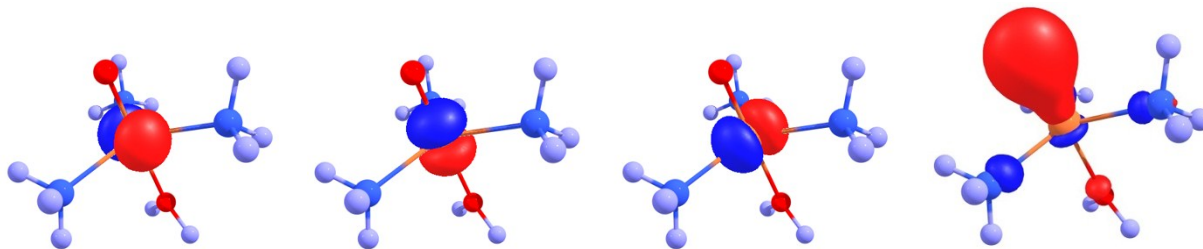

$3p_x(\text{Fe})$

2.00

$3p_z(\text{Fe})$

2.00

$3p_y(\text{Fe})$

2.00

$2s(\text{O})$

2.00

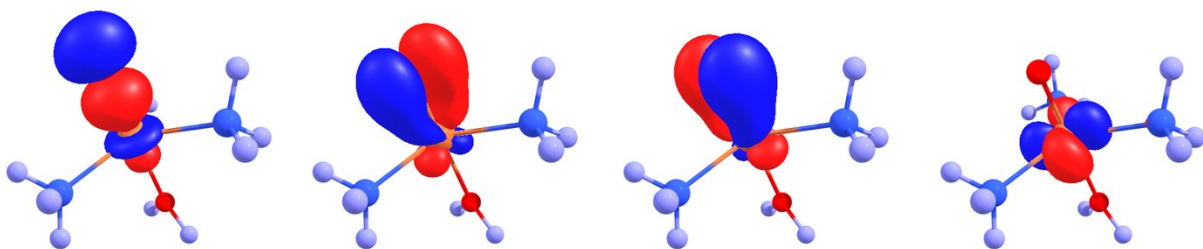

$\sigma(3d_z^2-2p_z)$

1.77

$\pi(3d_{yz}-2p_y)$

1.94

$\pi(3d_{xz}-2p_x)$

1.94

$3d_{xy}(\text{Fe})$

1.00

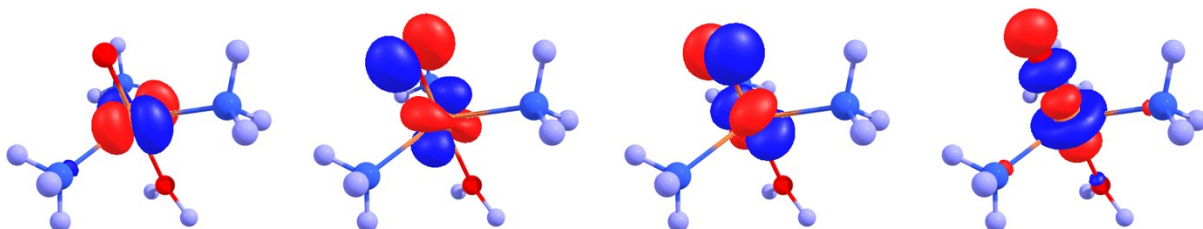

$3d_{x^2-y^2}(\text{Fe})$

1.00

$\pi^*(3d_{yz}-2p_y)$

1.06

$\pi^*(3d_{xz}-2p_x)$

1.06

$\sigma^*(3d_z^2-2p_z)$

0.24

#### 4. $[\text{Fe}(\text{O})(\text{H}_2\text{O})_{\text{ax}}(\text{NH}_3)_4]^{2+}$

CAS(18,12)

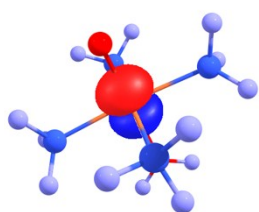

$3p_z$  (Fe)

2.00

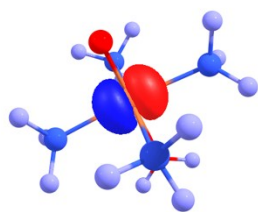

$3p_y$  (Fe)

2.00

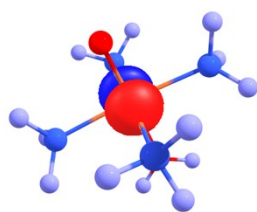

$3p_x$  (Fe)

2.00

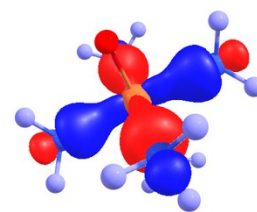

$\sigma$  ( $2p(\text{O})-3d_{x^2-y^2}$ )

2.00

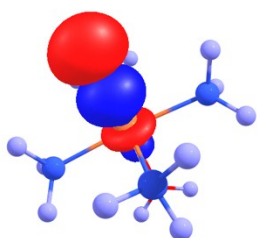

$\sigma$  ( $3d_{z^2}-2p_z$ )

1.77

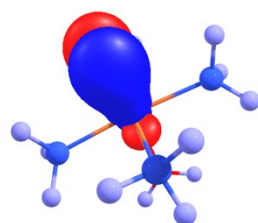

$\pi$  ( $3d_{xz}-2p_x$ )

1.94

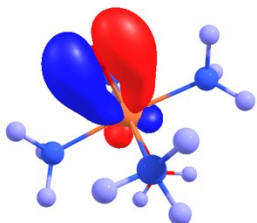

$\pi$  ( $3d_{yz}-2p_y$ )

1.94

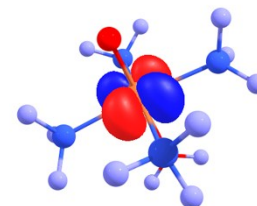

$3d_{xy}$

1.00

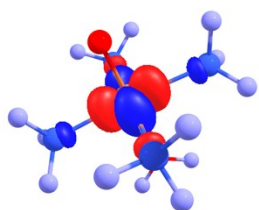

$3d_{x^2-y^2}$

1.00

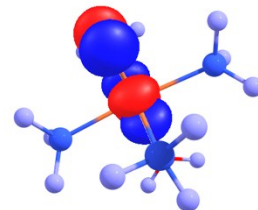

$\pi^*$  ( $3d_{xz}-2p_x$ )

1.06

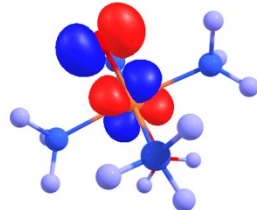

$\pi^*$  ( $3d_{yz}-2p_y$ )

1.06

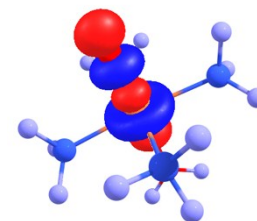

$\sigma^*$  ( $3d_{z^2}-2p_z$ )

0.24

## 5. $[\text{Fe}(\text{O})(\text{NH}_3)_4]^{2+}$

CAS(20,13)

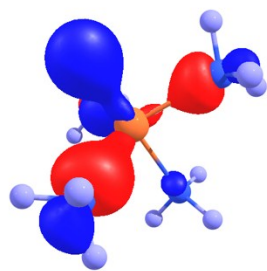

$\sigma (2p(\text{O})-3d_{x^2-y^2})$

2.00

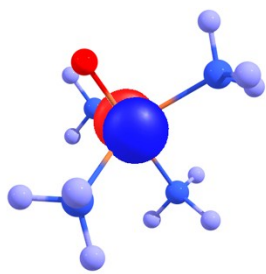

$3p_x (\text{Fe})$

2.00

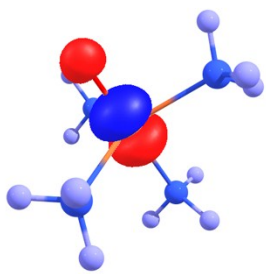

$3p_y (\text{Fe})$

2.00

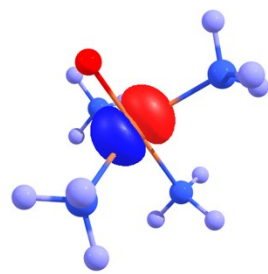

$3p_z (\text{Fe})$

2.00

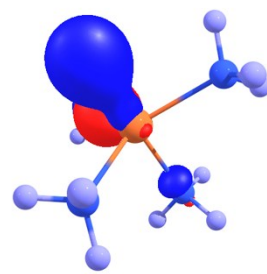

$2s (\text{O})$

2.00

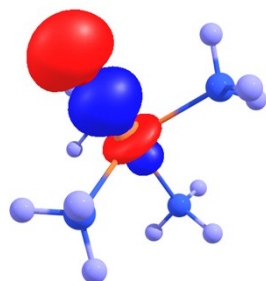

$\sigma (3d_z^2-2p_z)$

1.78

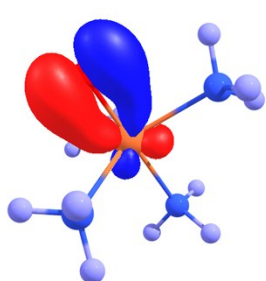

$\pi (3d_{yz}-2p_y)$

1.93

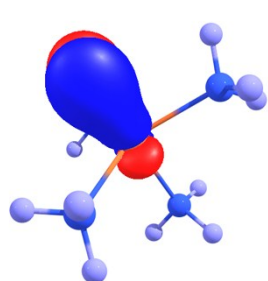

$\pi (3d_{xz}-2p_x)$

1.93

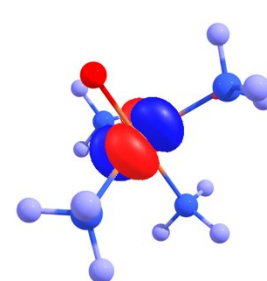

$3d_{xy} (\text{Fe})$

1.00

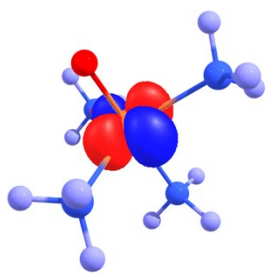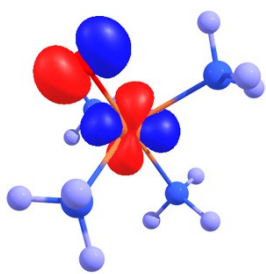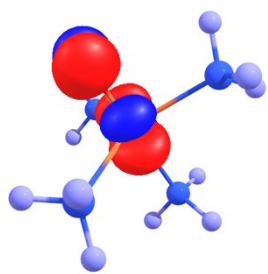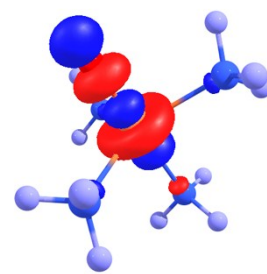

$3d_{x^2-y^2}(\text{Fe})$

1.00

$\pi^*(3d_{yz}-2p_y)$

1.07

$\pi^*(3d_{xz}-2p_x)$

1.07

$\sigma^*(3d_{z^2}-2p_z)$

0.23

## 6. $[\text{Fe}(\text{O})(\text{NH}_3)_5]^{2+}$

CAS(18,12)

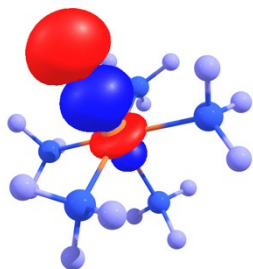

$\sigma(3d_{z^2}-2p_z)$

1.78

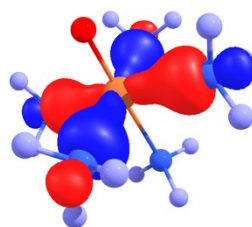

$\sigma(2p(\text{O})-3d_{x^2-y^2})$

2.00

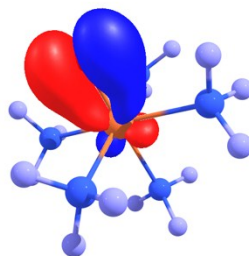

$\pi(3d_{yz}-2p_y)$

1.94

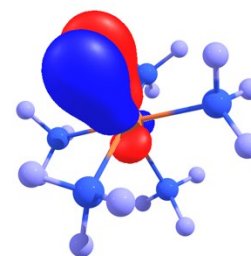

$\pi(3d_{xz}-2p_x)$

1.94

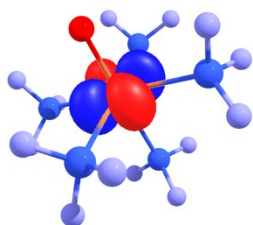

$3d_{xy}(\text{Fe})$

1.00

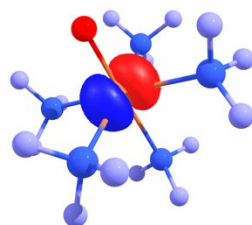

$3p_x(\text{Fe})$

2.00

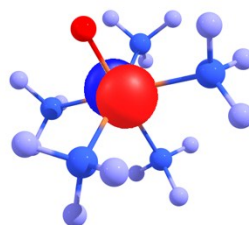

$3p_y(\text{Fe})$

2.00

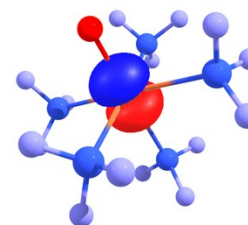

$3p_z(\text{Fe})$

2.00

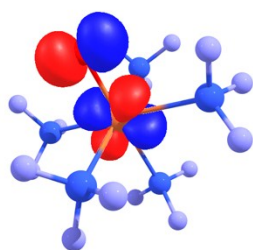

$\pi^*(3d_{yz}-2p_y)$

1.06

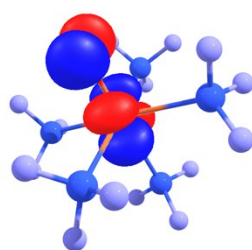

$\pi^*(3d_{xz}-2p_x)$

1.06

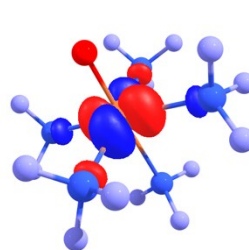

$\sigma^*(2p(\text{O})-3d_{x^2-y^2})$

1.00

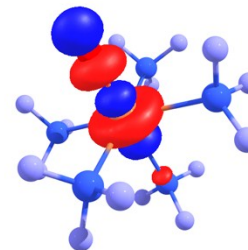

$\sigma^*(3d_{z^2}-2p_z)$

0.23

### S6. Geometry Coordinates from Symmetric Ligand Scan Geometries

Color coding: Red = Oxygen, Pink = Iron, Blue = Hydrogen, Nitrogen = Purple

#### - [FeO(NH<sub>3</sub>)]<sup>2+</sup>

|    |               |               |               |
|----|---------------|---------------|---------------|
| Fe | -0.4043506589 | 0.0000000000  | -0.2070793284 |
| O  | 0.9613167155  | 0.0000000000  | -1.0687414421 |
| N  | 0.3926021986  | 0.0000000000  | 1.6192168835  |
| H  | -0.2942447731 | 0.0000000000  | 2.3735054713  |
| H  | 0.9915274968  | 0.8100677496  | 1.7817255274  |
| H  | 0.9915274968  | -0.8100677496 | 1.7817255274  |

#### - [FeO(H<sub>2</sub>O)]<sup>2+</sup>

|    |              |               |               |
|----|--------------|---------------|---------------|
| Fe | 0.0000000000 | 0.4017531482  | -0.1881917559 |
| O  | 0.0000000000 | -0.9089368885 | -1.1379030084 |
| O  | 0.0000000000 | -0.4097203036 | 1.5365100107  |
| H  | 0.0000000000 | -1.3652975570 | 1.7021000376  |
| H  | 0.0000000000 | 0.0368611554  | 2.3978187245  |

#### - [Fe(O)(H<sub>2</sub>O)<sub>4</sub>]<sup>2+</sup>

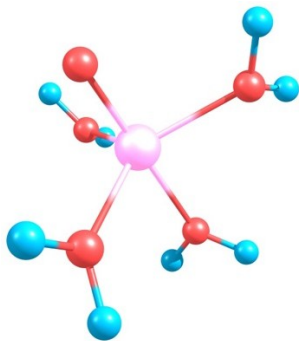

|   |              |              |              |
|---|--------------|--------------|--------------|
| O | 1.974997387  | 0.0000000000 | -0.003212361 |
| O | -0.971915766 | -1.718838285 | -0.039996173 |
| O | -1.039779114 | 1.678614122  | -0.041701598 |



|    |              |              |              |
|----|--------------|--------------|--------------|
| O  | 0.002259902  | -0.000462147 | -2.097228345 |
| O  | 0.000000000  | 0.000000000  | 1.600000000  |
| H  | 2.600549515  | 0.138256617  | -0.737645072 |
| H  | 2.484537632  | 0.032077690  | 0.829222289  |
| H  | -1.598335225 | -2.049065927 | -0.711029593 |
| H  | -1.205098860 | -2.158707585 | 0.800745280  |
| H  | -1.727498747 | 1.943153927  | -0.681634000 |
| H  | -1.275043808 | 2.105323428  | 0.805604936  |
| H  | 0.210403233  | -0.763346794 | -2.666962796 |
| H  | 0.085269318  | 0.777762267  | -2.677872367 |
| Fe | 0.000000000  | 0.000000000  | 0.000000000  |

- [Fe(O)(H<sub>2</sub>O)<sub>5</sub>]<sup>2+</sup>

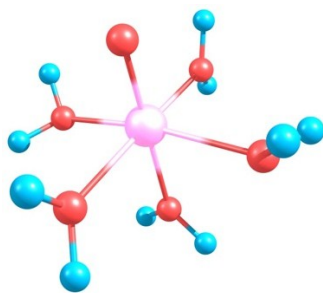

|   |              |              |              |
|---|--------------|--------------|--------------|
| O | -0.025324230 | -2.049417997 | -0.041767885 |
| O | 0.018849756  | 2.049408663  | -0.045484229 |
| O | -2.091357365 | -0.003399065 | -0.190296653 |
| O | 2.091724903  | 0.000000000  | -0.186244274 |
| O | 0.000000000  | 0.000000000  | -2.050000000 |

|    |              |              |              |
|----|--------------|--------------|--------------|
| O  | 0.000000000  | 0.000000000  | 1.600000000  |
| H  | 0.260399742  | -2.632099615 | -0.767385167 |
| H  | 0.049613005  | -2.570390225 | 0.778375753  |
| H  | -0.256547139 | 2.632281806  | -0.774863295 |
| H  | -0.050403127 | 2.574707980  | 0.772321401  |
| H  | -2.580231187 | 0.463152843  | 0.513968066  |
| H  | -2.524603255 | -0.876801455 | -0.228070598 |
| H  | 2.527469540  | 0.870553159  | -0.250799077 |
| H  | 2.578388690  | -0.445707735 | 0.532921650  |
| H  | -0.775217582 | 0.084068720  | -2.630623087 |
| H  | 0.770013452  | -0.102120708 | -2.634583142 |
| Fe | 0.000000000  | 0.000000000  | 0.000000000  |

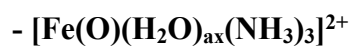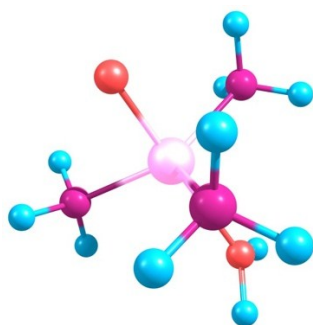

|   |              |              |              |
|---|--------------|--------------|--------------|
| H | -1.969017521 | 1.763896885  | -0.179520430 |
| N | 2.049920395  | 0.000000000  | 0.018065784  |
| H | 2.378612673  | 0.463383954  | 0.875685970  |
| H | 2.460258679  | -0.943262945 | 0.060926736  |

|    |              |              |              |
|----|--------------|--------------|--------------|
| N  | -1.063186751 | -1.752357423 | 0.037113271  |
| H  | -0.547796050 | -2.483872511 | 0.545826459  |
| H  | -1.932139033 | -1.636509780 | 0.576587934  |
| H  | 2.519998137  | 0.476816421  | -0.762537668 |
| H  | -0.878691937 | 2.233643157  | 0.939027862  |
| H  | -1.334910020 | -2.163671736 | -0.864510777 |
| O  | 0.000000000  | 0.000000000  | 1.600000000  |
| O  | 0.023772286  | 0.034298795  | -2.130703119 |
| H  | 0.592206090  | -0.498664922 | -2.713403512 |
| H  | -0.671387869 | 0.376299128  | -2.719225917 |
| Fe | 0.000000000  | 0.000000000  | 0.000000000  |
| N  | -0.957193918 | 1.812805740  | 0.003892893  |
| H  | -0.588802491 | 2.513246081  | -0.653550623 |

- [Fe(O)(H<sub>2</sub>O)<sub>ax</sub>(NH<sub>3</sub>)<sub>4</sub>]<sup>2+</sup>

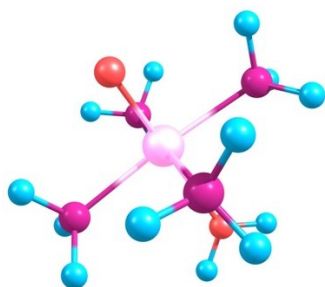

|   |              |              |              |
|---|--------------|--------------|--------------|
| N | 0.011818146  | 1.997840616  | -0.092158574 |
| N | -0.016060516 | -1.997953654 | -0.089012677 |
| N | 1.999986438  | 0.000000000  | 0.007365269  |

|    |              |              |              |
|----|--------------|--------------|--------------|
| N  | -1.999964367 | 0.011728931  | 0.002227813  |
| O  | 0.000000000  | 0.000000000  | 1.575000000  |
| H  | 0.848903420  | 2.443380110  | -0.486656209 |
| H  | -0.034601525 | 2.346750995  | 0.873429167  |
| H  | 0.772723204  | -2.463294938 | -0.553839200 |
| H  | 0.010070559  | -2.345791853 | 0.877704124  |
| H  | 2.360876469  | 0.745711942  | 0.614344185  |
| H  | 2.383678888  | -0.855526283 | 0.426177414  |
| Fe | 0.000000000  | 0.000000000  | 0.000000000  |
| H  | 2.483454428  | 0.108160151  | -0.891741174 |
| H  | -0.847283168 | -2.439346777 | -0.500311887 |
| H  | -2.375801146 | -0.755880160 | 0.571519557  |
| H  | -2.380296956 | 0.852313979  | 0.452992615  |
| H  | -0.769838111 | 2.458729566  | -0.573197146 |
| H  | -2.470153867 | -0.053712237 | -0.908000542 |
| O  | -0.021256122 | -0.005841773 | -2.174543858 |
| H  | 0.057494079  | -0.772889174 | -2.763736134 |
| H  | -0.001455858 | 0.761695292  | -2.768040971 |

- [Fe(O)(NH<sub>3</sub>)<sub>4</sub>]<sup>2+</sup>

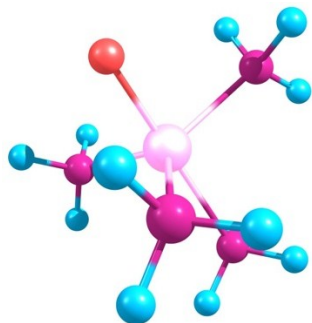

|    |              |              |              |
|----|--------------|--------------|--------------|
| Fe | 0.000000000  | 0.000000000  | 0.000000000  |
| N  | -0.996851010 | -1.762200247 | 0.039539291  |
| H  | -1.897983673 | -1.785930465 | -0.455955936 |
| H  | -0.470214318 | -2.571280305 | -0.316399273 |
| N  | 0.000003427  | -0.000010763 | -2.143701232 |
| H  | -0.932774168 | -0.026540562 | -2.576390633 |
| H  | 0.446424488  | 0.822271644  | -2.571343279 |
| N  | -1.017361522 | 1.749689804  | 0.064700249  |
| H  | -1.656506274 | 1.731826218  | 0.870660883  |
| H  | -0.390135460 | 2.542808792  | 0.257718112  |
| N  | 2.023654895  | 0.000000000  | 0.073796110  |
| H  | 2.349470234  | 0.785404903  | 0.653570964  |
| H  | 2.354062100  | -0.832197699 | 0.581415294  |
| H  | -1.584211402 | 2.036992641  | -0.742795344 |
| H  | -1.213918609 | -1.989454686 | 1.018509857  |
| H  | 2.575763671  | 0.040020046  | -0.791608476 |
| H  | 0.489549476  | -0.797329650 | -2.571199188 |
| O  | 0.000000000  | 0.000000000  | 1.625000000  |

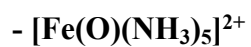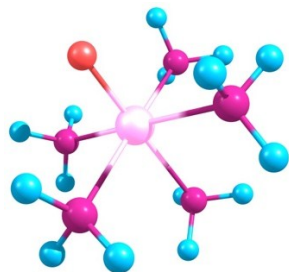

|    |            |            |            |
|----|------------|------------|------------|
| N  | -2.0684900 | 0.2405462  | -0.0378584 |
| N  | 2.0387532  | -0.2337470 | -0.1740065 |
| N  | -0.2827677 | -2.0453708 | -0.1475585 |
| N  | 0.1893428  | 2.0632335  | -0.1330840 |
| N  | 0.0930517  | -0.0151201 | 2.0698087  |
| O  | -0.0637871 | 0.0157128  | -1.7449848 |
| H  | -2.5846588 | -0.5139995 | 0.4132369  |
| H  | -2.3964865 | 0.2712763  | -1.0039742 |
| H  | 2.4009582  | -1.0811794 | 0.2614763  |
| H  | 2.2978936  | -0.2834534 | -1.1602483 |
| H  | -0.8435991 | -2.2616141 | -0.9720916 |
| H  | 0.5801311  | -2.5719806 | -0.2780429 |
| H  | 0.5160100  | -0.8620062 | 2.4493929  |
| H  | 0.6508541  | 0.7458829  | 2.4570273  |
| Fe | -0.0149291 | 0.0049672  | -0.1292325 |
| H  | -0.7527503 | -2.4714422 | 0.6506252  |
| H  | 2.5860913  | 0.5268184  | 0.2269483  |
| H  | -0.8089068 | 0.0583244  | 2.5401588  |

|   |            |           |            |
|---|------------|-----------|------------|
| H | 1.1520692  | 2.3863830 | -0.2206220 |
| H | -0.2744240 | 2.3996800 | -0.9774833 |
| H | -2.3991583 | 1.0996054 | 0.4003135  |
| H | -0.2082999 | 2.5811348 | 0.6499211  |

## References

- (1) Kazaryan, A.; Baerends, E. J., Ligand Field Effects and the High Spin–High Reactivity Correlation in the H Abstraction by Non-Heme Iron(IV)–Oxo Complexes: A DFT Frontier Orbital Perspective. *ACS Catal.* **2015**, *5*, 1475–1488.
- (2) Andrikopoulos, P. C.; Michel, C.; Chouzier, S.; Sautet, P., In Silico Screening of Iron-Oxo Catalysts for CH Bond Cleavage. *ACS Catal.* **2015**, *5*, 2490–2499.
- (3) Manni, G. L.; Smart, S. D.; Alavi, A., Combining the Complete Active Space Self-Consistent Field Method and the Full Configuration Interaction Quantum Monte Carlo within a Super-CI Framework, with Application to Challenging Metal-Porphyrins. *J. Chem. Theory Comput.* **2016**, *12*, 1245–1258.
- (4) Radoń, M.; Pierloot, K., Binding of CO, NO, and O<sub>2</sub> to Heme by Density Functional and Multireference ab Initio Calculations. *J. Phys. Chem. A* **2008**, *112*, 11824–11832.
- (5) England, J.; Marlène Martinho; Farquhar, E. R.; Frisch, J. R.; Bominaar, E. L.; Münck, E.; Que, L., A Synthetic High-Spin Oxoiron(IV) Complex: Generation, Spectroscopic Characterization, and Reactivity. *Angew. Chem. Int. Ed.* **2009**, *48*, 3622–3626.
- (6) Lee, C.; Yang, W.; Parr, R. G., Development of the Colle-Salvetti Correlation-Energy Formula into a Functional of the Electron Density. *Phys. Rev. B* **1988**, *37*, 785.
- (7) Becke, A. D., Density-Functional Exchange-Energy Approximation with Correct Asymptotic Behavior. *Phys. Rev. A* **1988**, *38*, 3098.
- (8) Weigend, F.; Ahlrichs, R., Balanced basis sets of split valence, triple zeta valence and quadruple zeta valence quality for H to Rn: Design and assessment of accuracy. *Phys. Chem. Chem. Phys.* **2005**, *7*, 3297–3305.
- (9) Weigend, F., Accurate Coulomb-fitting basis sets for H to Rn. *Phys. Chem. Chem. Phys.* **2006**, *8*, 1057–1065.
